# Supplementary material for: Influence of the electronic effect of an ancillary ligand on MMCT and LMCT in localized cyanide-bridged complexes containing non-innocent ligands
Source: Royal Society of Chemistry journal article supplement (doi:10.1039/d2dt03048a), 2022-01-01
Supplement: d2dt03048a1.pdf [file d2dt03048a1.pdf]

*Supplementary Information for*

**Influence of electronic effect of ancillary ligand on MMCT and LMCT  
in localized cyanide-bridged complexes containing non-innocent  
ligands**

**Yong He<sup>a,b</sup>, Ying-Ying Huang<sup>a,b</sup>, Jin-Hui Fu<sup>a,b</sup>, Yang Liu<sup>a,b</sup>, Xin-Tao Wu<sup>a</sup> and  
Tian-Lu Sheng<sup>\*a</sup>**

<sup>a</sup> State Key Laboratory of Structural Chemistry, Fujian Institute of Research on the Structure of Matter, Chinese Academy of Sciences. Fuzhou, Fujian 350002, P.R. China

<sup>b</sup> School of Chemical Sciences, University of Chinese Academy of Sciences. Beijing, 100049, P.R. China

# Table of Contents

## 1. Single crystal structure

Fig. S1 Single crystal structures of precursors  $\text{CpMe}_n\text{Ru}(\text{dppe})\text{CN}$  ( $n = 0, 1, 5$ ).

## 2. Crystallographic data

Table S1 Crystallographic data for complexes  $\mathbf{1}_{\text{Me}}[\text{PF}_6]$ ,  $\mathbf{2}_{\text{Me}}[\text{PF}_6]$  and  $\mathbf{3}_{\text{Me}}[\text{I}]$ .

Table S2 Crystallographic data for complexes  $\mathbf{1}_{\text{Et}}[\text{PF}_6]$ ,  $\mathbf{2}_{\text{Et}}[\text{PF}_6]$  and  $\mathbf{3}_{\text{Et}}[\text{I}]$ .

Table S3 Crystallographic data for complexes  $\mathbf{1}_{\text{Pr}}[\text{PF}_6]$ ,  $\mathbf{2}_{\text{Pr}}[\text{PF}_6]$  and  $\mathbf{3}_{\text{Pr}}[\text{I}]$ .

Table S4 Crystallographic data for complexes  $\mathbf{1}_{\text{Bu}}[\text{PF}_6]$ ,  $\mathbf{2}_{\text{Bu}}[\text{PF}_6]$  and  $\mathbf{3}_{\text{Bu}}[\text{I}]$ .

Table S5 Crystallographic data for complexes  $\text{CpMe}_n\text{Ru}(\text{dppe})\text{CN}$  ( $n = 0, 1, 5$ ).

## 3. IR spectra

Fig. S2 Stretching frequencies of complexes  $\mathbf{1}_{\text{Et}}[\text{PF}_6]$ ,  $\mathbf{2}_{\text{Et}}[\text{PF}_6]$  and  $\mathbf{3}_{\text{Et}}[\text{I}]$ .

Fig. S3 Stretching frequencies of complexes  $\mathbf{1}_{\text{Pr}}[\text{PF}_6]$ ,  $\mathbf{2}_{\text{Pr}}[\text{PF}_6]$  and  $\mathbf{3}_{\text{Pr}}[\text{I}]$ .

Fig. S4 Stretching frequencies of complexes  $\mathbf{1}_{\text{Bu}}[\text{PF}_6]$ ,  $\mathbf{2}_{\text{Bu}}[\text{PF}_6]$  and  $\mathbf{3}_{\text{Bu}}[\text{I}]$ .

## 4. Magnetic properties

Fig. S5 The magnetic susceptibility plots of complexes  $\mathbf{1}_{\text{Me}}[\text{PF}_6]$  and  $\mathbf{1}_{\text{Et}}[\text{PF}_6]$ .

Fig. S6 The magnetic susceptibility plots of complexes  $\mathbf{1}_{\text{Pr}}[\text{PF}_6]$  and  $\mathbf{1}_{\text{Bu}}[\text{PF}_6]$ .

## 5. UV-vis-NIR spectroscopy

Table S6 The electronic absorption peaks of all bimetallic complexes.

Fig. S7 The UV-vis-NIR spectra of complexes  $\mathbf{1}_{\text{Et}}^+$ ,  $\mathbf{2}_{\text{Et}}^+$  and  $\mathbf{3}_{\text{Et}}^+$  in  $\text{CH}_2\text{Cl}_2$  solution.

Fig. S8 The UV-vis-NIR spectra of complexes  $\mathbf{1}_{\text{Pr}}^+$ ,  $\mathbf{2}_{\text{Pr}}^+$  and  $\mathbf{3}_{\text{Pr}}^+$  in  $\text{CH}_2\text{Cl}_2$  solution.

Fig. S9 The UV-vis-NIR spectra of complexes  $\mathbf{1}_{\text{Bu}}^+$ ,  $\mathbf{2}_{\text{Bu}}^+$  and  $\mathbf{3}_{\text{Bu}}^+$  in  $\text{CH}_2\text{Cl}_2$  solution.

## 6. TDDFT calculations

Fig. S10 Molecular orbital diagrams for the LMCT and MMCT transitions of  $\mathbf{1}_{\text{Et}}[\text{PF}_6]$ .

Fig. S11 Molecular orbital diagrams for the LMCT and MMCT transitions of  $\mathbf{1}_{\text{Pr}}[\text{PF}_6]$ .

Fig. S12 Molecular orbital diagrams for the LMCT and MMCT transitions of  $\mathbf{1}_{\text{Bu}}[\text{PF}_6]$ .

Fig. S13 Molecular orbital diagrams for the LMCT and MMCT transitions of  $\mathbf{2}_{\text{Me}}[\text{PF}_6]$ .

Fig. S14 Molecular orbital diagrams for the LMCT and MMCT transitions of  $\mathbf{3}_{\text{Me}}[\text{I}]$ .

Fig. S15 The computed spin density distribution of complexes  $\mathbf{2}_{\text{Me}}[\text{PF}_6]$  and  $\mathbf{3}_{\text{Me}}[\text{I}]$ .

Fig. S16 The computed spin density distribution of complexes  $\mathbf{1}_{\text{Et}}[\text{PF}_6]$ ,  $\mathbf{1}_{\text{Pr}}[\text{PF}_6]$  and  $\mathbf{1}_{\text{Bu}}[\text{PF}_6]$ .

## 1. Single crystal structure

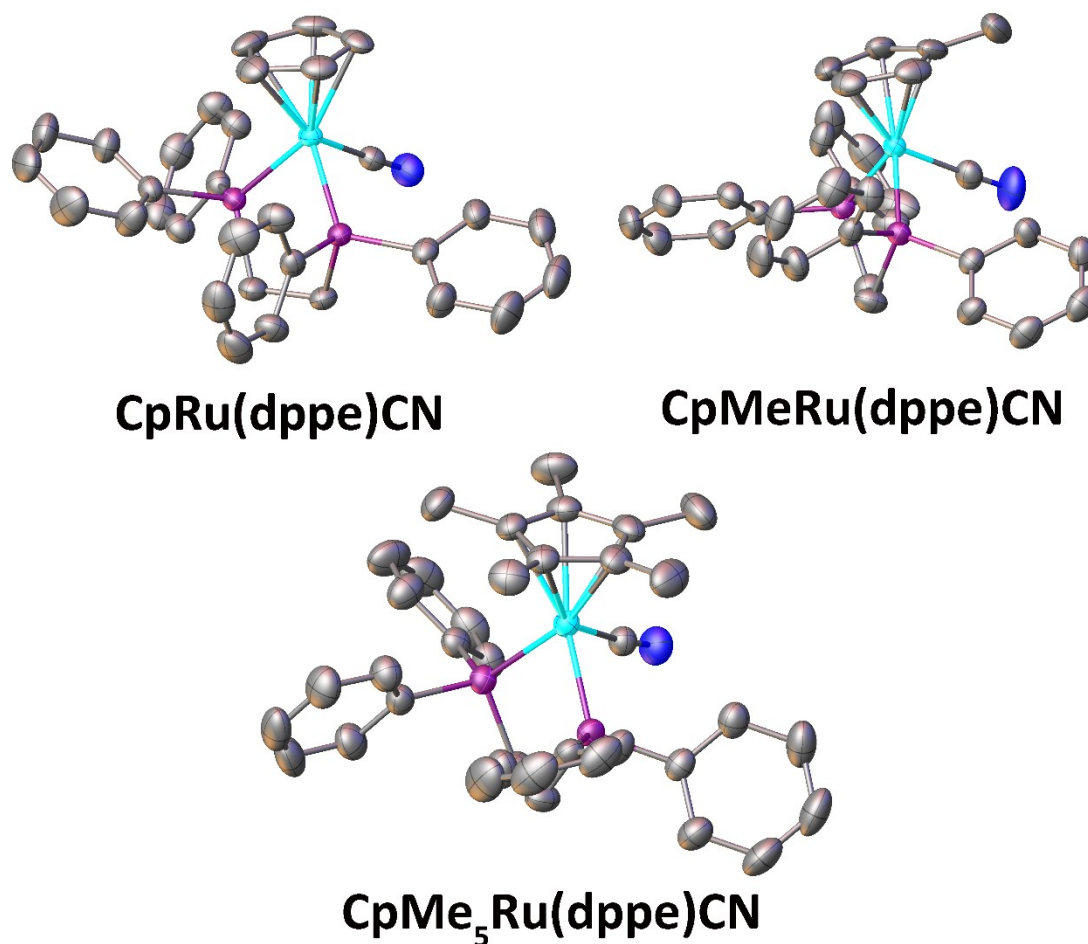

**Fig. S1** Molecular structures of precursors **CpMe<sub>n</sub>Ru(dppe)CN** ( $n = 0, 1, 5$ ). Hydrogen atoms and solvents have been omitted for clarity. Ru, light blue; P, purple; C, gray; N, blue.

## 2. Crystallographic data

**Table S1** Crystallographic data for complexes **1<sub>Me</sub>[PF<sub>6</sub>]**, **2<sub>Me</sub>[PF<sub>6</sub>]** and **3<sub>Me</sub>[I]**.

|                                             | <b>1<sub>Me</sub>[PF<sub>6</sub>]</b>                                                           | <b>2<sub>Me</sub>[PF<sub>6</sub>]</b>                                                           | <b>3<sub>Me</sub>[I]</b>                                                          |
|---------------------------------------------|-------------------------------------------------------------------------------------------------|-------------------------------------------------------------------------------------------------|-----------------------------------------------------------------------------------|
| Empirical formula                           | C <sub>41</sub> H <sub>44</sub> F <sub>6</sub> FeN <sub>7</sub> P <sub>3</sub> RuS <sub>2</sub> | C <sub>42</sub> H <sub>46</sub> F <sub>6</sub> FeN <sub>7</sub> P <sub>3</sub> RuS <sub>2</sub> | C <sub>46</sub> H <sub>54</sub> FeIN <sub>7</sub> P <sub>2</sub> RuS <sub>2</sub> |
| Formula weight                              | 1062.78                                                                                         | 1076.81                                                                                         | 1114.84                                                                           |
| Temperature/K                               | 293(2)                                                                                          | 293(2)                                                                                          | 293(2)                                                                            |
| Crystal system                              | monoclinic                                                                                      | orthorhombic                                                                                    | monoclinic                                                                        |
| Space group                                 | P2 <sub>1</sub> /c                                                                              | P2 <sub>1</sub> 2 <sub>1</sub> 2 <sub>1</sub>                                                   | Cc                                                                                |
| a/Å                                         | 16.5744(4)                                                                                      | 15.1069(4)                                                                                      | 11.2180(3)                                                                        |
| b/Å                                         | 19.3582(4)                                                                                      | 15.3402(5)                                                                                      | 19.4971(4)                                                                        |
| c/Å                                         | 16.0088(3)                                                                                      | 21.6504(6)                                                                                      | 22.9165(5)                                                                        |
| α/°                                         | 90                                                                                              | 90                                                                                              | 90                                                                                |
| β/°                                         | 103.576(2)                                                                                      | 90                                                                                              | 99.516(2)                                                                         |
| γ/°                                         | 90                                                                                              | 90                                                                                              | 90                                                                                |
| Volume/Å <sup>3</sup>                       | 4992.92(19)                                                                                     | 5017.3(3)                                                                                       | 4943.3(2)                                                                         |
| Z                                           | 4                                                                                               | 4                                                                                               | 4                                                                                 |
| ρ <sub>calc</sub> /cm <sup>3</sup>          | 1.414                                                                                           | 1.426                                                                                           | 1.498                                                                             |
| μ/mm <sup>-1</sup>                          | 0.831                                                                                           | 0.828                                                                                           | 1.412                                                                             |
| F(000)                                      | 2160.0                                                                                          | 2192.0                                                                                          | 2256.0                                                                            |
| Crystal size/mm <sup>3</sup>                | 0.25 × 0.25 × 0.08                                                                              | 0.18 × 0.03 × 0.03                                                                              | 0.15 × 0.08 × 0.05                                                                |
| Radiation                                   | Mo Kα (λ = 0.71073)                                                                             | Mo Kα (λ = 0.71073)                                                                             | Mo Kα (λ = 0.71073)                                                               |
| 2θ range for data collection/°              | 3.358 to 49.424                                                                                 | 4.63 to 51.35                                                                                   | 4.178 to 59.148                                                                   |
| Index ranges                                | -19 ≤ h ≤ 19,<br>-22 ≤ k ≤ 22,<br>-18 ≤ l ≤ 18                                                  | -18 ≤ h ≤ 18,<br>-18 ≤ k ≤ 18,<br>-26 ≤ l ≤ 26                                                  | -15 ≤ h ≤ 15,<br>-27 ≤ k ≤ 27,<br>-31 ≤ l ≤ 31                                    |
| Reflections collected                       | 60859                                                                                           | 49028                                                                                           | 41037                                                                             |
| Independent reflections                     | 8512 [R <sub>int</sub> = 0.0476,<br>R <sub>sigma</sub> = 0.0208]                                | 9279 [R <sub>int</sub> = 0.0399,<br>R <sub>sigma</sub> = 0.0257]                                | 13810 [R <sub>int</sub> = 0.0166,<br>R <sub>sigma</sub> = 0.0153]                 |
| Data/restraints/parameters                  | 8512/0/554                                                                                      | 9279/126/565                                                                                    | 13810/2/539                                                                       |
| Goodness-of-fit on F <sup>2</sup>           | 1.046                                                                                           | 1.067                                                                                           | 1.017                                                                             |
| Final R indexes [I ≥ 2σ (I)]                | R <sub>1</sub> = 0.0393,<br>wR <sub>2</sub> = 0.0964                                            | R <sub>1</sub> = 0.0638,<br>wR <sub>2</sub> = 0.1630                                            | R <sub>1</sub> = 0.0226,<br>wR <sub>2</sub> = 0.0549                              |
| Final R indexes [all data]                  | R <sub>1</sub> = 0.0468,<br>wR <sub>2</sub> = 0.1006                                            | R <sub>1</sub> = 0.0673,<br>wR <sub>2</sub> = 0.1667                                            | R <sub>1</sub> = 0.0242,<br>wR <sub>2</sub> = 0.0554                              |
| Largest diff. peak/hole / e Å <sup>-3</sup> | 0.60/-0.43                                                                                      | 2.83/-0.82                                                                                      | 0.66/-0.58                                                                        |
| Flack parameter                             | -                                                                                               | 0.09(4)                                                                                         | -0.008(10)                                                                        |

$$R_1 = \sum (| |F_o| - |F_c| |) / \sum |F_o|; wR_2 = [\sum w (|F_o^2| - |F_c^2|)^2 / \sum w |F_o^2|^2]^{1/2}$$

**Table S2** Crystallographic data for complexes **1<sub>Et</sub>[PF<sub>6</sub>]**, **2<sub>Et</sub>[PF<sub>6</sub>]** and **3<sub>Et</sub>[I]**.

|                                                | <b>1<sub>Et</sub>[PF<sub>6</sub>]</b>                                                           | <b>2<sub>Et</sub>[PF<sub>6</sub>]</b>                                                                                                          | <b>3<sub>Et</sub>[I]</b>                                                          |
|------------------------------------------------|-------------------------------------------------------------------------------------------------|------------------------------------------------------------------------------------------------------------------------------------------------|-----------------------------------------------------------------------------------|
| Empirical formula                              | C <sub>43</sub> H <sub>48</sub> F <sub>6</sub> FeN <sub>7</sub> P <sub>3</sub> RuS <sub>2</sub> | C <sub>89</sub> H <sub>102</sub> Cl <sub>2</sub> F <sub>12</sub> Fe <sub>2</sub> N <sub>14</sub> P <sub>6</sub> Ru <sub>2</sub> S <sub>4</sub> | C <sub>48</sub> H <sub>58</sub> FeIN <sub>7</sub> P <sub>2</sub> RuS <sub>2</sub> |
| Formula weight                                 | 1090.83                                                                                         | 2294.64                                                                                                                                        | 1142.89                                                                           |
| Temperature/K                                  | 293                                                                                             | 293                                                                                                                                            | 293(2)                                                                            |
| Crystal system                                 | monoclinic                                                                                      | orthorhombic                                                                                                                                   | monoclinic                                                                        |
| Space group                                    | P2 <sub>1</sub> /c                                                                              | P2 <sub>1</sub> 2 <sub>1</sub> 2 <sub>1</sub>                                                                                                  | P2 <sub>1</sub> /c                                                                |
| a/Å                                            | 11.5914(2)                                                                                      | 15.3525(5)                                                                                                                                     | 15.5201(5)                                                                        |
| b/Å                                            | 23.9157(5)                                                                                      | 15.8856(7)                                                                                                                                     | 15.2285(4)                                                                        |
| c/Å                                            | 18.2913(4)                                                                                      | 21.9881(7)                                                                                                                                     | 22.4356(8)                                                                        |
| α/°                                            | 90                                                                                              | 90                                                                                                                                             | 90                                                                                |
| β/°                                            | 107.362(2)                                                                                      | 90                                                                                                                                             | 106.738(4)                                                                        |
| γ/°                                            | 90                                                                                              | 90                                                                                                                                             | 90                                                                                |
| Volume/Å <sup>3</sup>                          | 4839.62(18)                                                                                     | 5362.5(3)                                                                                                                                      | 5077.9(3)                                                                         |
| Z                                              | 4                                                                                               | 2                                                                                                                                              | 4                                                                                 |
| ρ <sub>calc</sub> /cm <sup>3</sup>             | 1.497                                                                                           | 1.421                                                                                                                                          | 1.495                                                                             |
| μ/mm <sup>-1</sup>                             | 0.859                                                                                           | 0.827                                                                                                                                          | 1.376                                                                             |
| F(000)                                         | 2224.0                                                                                          | 2340.0                                                                                                                                         | 2320.0                                                                            |
| Crystal size/mm <sup>3</sup>                   | 0.25 × 0.23 × 0.22                                                                              | 0.25 × 0.05 × 0.05                                                                                                                             | 0.25 × 0.05 × 0.03                                                                |
| Radiation                                      | Mo Kα (λ = 0.71073)                                                                             | Mo Kα (λ = 0.71073)                                                                                                                            | Mo Kα (λ = 0.71073)                                                               |
| 2θ range for data collection/°                 | 3.682 to 59.148                                                                                 | 3.69 to 51.362                                                                                                                                 | 3.83 to 54.968                                                                    |
| Index ranges                                   | -16 ≤ h ≤ 16,<br>-33 ≤ k ≤ 33,<br>-25 ≤ l ≤ 25                                                  | -17 ≤ h ≤ 18,<br>-19 ≤ k ≤ 18,<br>-26 ≤ l ≤ 24                                                                                                 | -20 ≤ h ≤ 20,<br>-19 ≤ k ≤ 19,<br>-29 ≤ l ≤ 29                                    |
| Reflections collected                          | 83624                                                                                           | 27482                                                                                                                                          | 75780                                                                             |
| Independent reflections                        | 13553 [R <sub>int</sub> = 0.0523,<br>R <sub>sigma</sub> = 0.0337]                               | 10065 [R <sub>int</sub> = 0.0530,<br>R <sub>sigma</sub> = 0.0591]                                                                              | 11636 [R <sub>int</sub> = 0.0401,<br>R <sub>sigma</sub> = 0.0231]                 |
| Data/restraints/parameter<br>s                 | 13553/0/580                                                                                     | 10065/316/598                                                                                                                                  | 11636/0/576                                                                       |
| Goodness-of-fit on F <sup>2</sup>              | 1.056                                                                                           | 1.043                                                                                                                                          | 1.040                                                                             |
| Final R indexes [I ≥ 2σ (I)]                   | R <sub>1</sub> = 0.0565,<br>wR <sub>2</sub> = 0.1320                                            | R <sub>1</sub> = 0.0688,<br>wR <sub>2</sub> = 0.1789                                                                                           | R <sub>1</sub> = 0.0363,<br>wR <sub>2</sub> = 0.0847                              |
| Final R indexes [all data]                     | R <sub>1</sub> = 0.0876,<br>wR <sub>2</sub> = 0.1465                                            | R <sub>1</sub> = 0.0855,<br>wR <sub>2</sub> = 0.1922                                                                                           | R <sub>1</sub> = 0.0479,<br>wR <sub>2</sub> = 0.0896                              |
| Largest diff. peak/hole / e<br>Å <sup>-3</sup> | 0.79/-0.43                                                                                      | 0.99/-1.01                                                                                                                                     | 0.86/-0.67                                                                        |
| Flack parameter                                | -                                                                                               | 0.03(5)                                                                                                                                        | -                                                                                 |

$$R_1 = \sum (| |F_o| - |F_c| |) / \sum |F_o|; wR_2 = [\sum w (|F_o^2| - |F_c^2|)^2 / \sum w |F_o^2|]^2 / 2}^{1/2}$$

**Table S3** Crystallographic data for complexes **1<sub>Pr</sub>[PF<sub>6</sub>]**, **2<sub>Pr</sub>[PF<sub>6</sub>]** and **3<sub>Pr</sub>[I]**.

|                                             | <b>1<sub>Pr</sub>[PF<sub>6</sub>]</b>                                                           | <b>2<sub>Pr</sub>[PF<sub>6</sub>]</b>                                                           | <b>3<sub>Pr</sub>[I]</b>                                                          |
|---------------------------------------------|-------------------------------------------------------------------------------------------------|-------------------------------------------------------------------------------------------------|-----------------------------------------------------------------------------------|
| Empirical formula                           | C <sub>45</sub> H <sub>52</sub> F <sub>6</sub> FeN <sub>7</sub> P <sub>3</sub> RuS <sub>2</sub> | C <sub>46</sub> H <sub>54</sub> F <sub>6</sub> FeN <sub>7</sub> P <sub>3</sub> RuS <sub>2</sub> | C <sub>50</sub> H <sub>62</sub> FeIN <sub>7</sub> P <sub>2</sub> RuS <sub>2</sub> |
| Formula weight                              | 1118.88                                                                                         | 1141.92                                                                                         | 1170.94                                                                           |
| Temperature/K                               | 293                                                                                             | 293                                                                                             | 293(2)                                                                            |
| Crystal system                              | monoclinic                                                                                      | monoclinic                                                                                      | monoclinic                                                                        |
| Space group                                 | P2 <sub>1</sub> /n                                                                              | P2 <sub>1</sub> /n                                                                              | P2 <sub>1</sub> /c                                                                |
| a/Å                                         | 15.7191(3)                                                                                      | 15.8198(3)                                                                                      | 15.8862(4)                                                                        |
| b/Å                                         | 17.2564(4)                                                                                      | 17.0381(3)                                                                                      | 15.2435(4)                                                                        |
| c/Å                                         | 19.6213(4)                                                                                      | 19.8147(3)                                                                                      | 22.9894(5)                                                                        |
| α/°                                         | 90                                                                                              | 90                                                                                              | 90                                                                                |
| β/°                                         | 101.990(2)                                                                                      | 102.958(2)                                                                                      | 108.041(3)                                                                        |
| γ/°                                         | 90                                                                                              | 90                                                                                              | 90                                                                                |
| Volume/Å <sup>3</sup>                       | 5206.26(19)                                                                                     | 5204.83(16)                                                                                     | 5293.4(2)                                                                         |
| Z                                           | 4                                                                                               | 4                                                                                               | 4                                                                                 |
| ρ <sub>calc</sub> /cm <sup>3</sup>          | 1.427                                                                                           | 1.457                                                                                           | 1.469                                                                             |
| μ/mm <sup>-1</sup>                          | 0.801                                                                                           | 0.803                                                                                           | 1.322                                                                             |
| F(000)                                      | 2288.0                                                                                          | 2340.0                                                                                          | 2384.0                                                                            |
| Crystal size/mm <sup>3</sup>                | 0.22 × 0.05 × 0.05                                                                              | 0.25 × 0.05 × 0.04                                                                              | 0.15 × 0.05 × 0.05                                                                |
| Radiation                                   | Mo Kα (λ = 0.71073)                                                                             | Mo Kα (λ = 0.71073)                                                                             | Mo Kα (λ = 0.71073)                                                               |
| 2θ range for data collection/°              | 4.244 to 51.364                                                                                 | 4.432 to 51.362                                                                                 | 4.582 to 51.364                                                                   |
| Index ranges                                | -19 ≤ h ≤ 19,<br>-17 ≤ k ≤ 21,<br>-23 ≤ l ≤ 23                                                  | -19 ≤ h ≤ 19,<br>-20 ≤ k ≤ 20,<br>-24 ≤ l ≤ 24                                                  | -19 ≤ h ≤ 19,<br>-18 ≤ k ≤ 18,<br>-28 ≤ l ≤ 28                                    |
| Reflections collected                       | 45953                                                                                           | 63025                                                                                           | 50139                                                                             |
| Independent reflections                     | 9819 [R <sub>int</sub> = 0.0360,<br>R <sub>sigma</sub> = 0.0191]                                | 9659 [R <sub>int</sub> = 0.0237,<br>R <sub>sigma</sub> = 0.0112]                                | 9904 [R <sub>int</sub> = 0.0277,<br>R <sub>sigma</sub> = 0.0155]                  |
| Data/restraints/parameters                  | 9819/246/590                                                                                    | 9659/18/600                                                                                     | 9904/0/594                                                                        |
| Goodness-of-fit on F <sup>2</sup>           | 1.020                                                                                           | 1.044                                                                                           | 1.034                                                                             |
| Final R indexes [I >= 2σ (I)]               | R <sub>1</sub> = 0.0509,<br>wR <sub>2</sub> = 0.1451                                            | R <sub>1</sub> = 0.0494,<br>wR <sub>2</sub> = 0.1367                                            | R <sub>1</sub> = 0.0294,<br>wR <sub>2</sub> = 0.0745                              |
| Final R indexes [all data]                  | R <sub>1</sub> = 0.0564,<br>R <sub>2</sub> = 0.1510                                             | R <sub>1</sub> = 0.0549,<br>wR <sub>2</sub> = 0.1432                                            | R <sub>1</sub> = 0.0341,<br>wR <sub>2</sub> = 0.0770                              |
| Largest diff. peak/hole / e Å <sup>-3</sup> | 1.29/-0.67                                                                                      | 1.71/-0.60                                                                                      | 1.91/-1.01                                                                        |
| Flack parameter                             | -                                                                                               | -                                                                                               | -                                                                                 |

$$R_1 = \Sigma (|F_o| - |F_c|) / \Sigma |F_o|; wR_2 = [\Sigma w (|F_o^2| - |F_c^2|)^2 / \Sigma w |F_o^2|^2]^{1/2}$$

**Table S4** Crystallographic data for complexes **1<sub>Bu</sub>[PF<sub>6</sub>]**, **2<sub>Bu</sub>[PF<sub>6</sub>]** and **3<sub>Bu</sub>[I]**.

|                                             | <b>1<sub>Bu</sub>[PF<sub>6</sub>]</b>                                                           | <b>2<sub>Bu</sub>[PF<sub>6</sub>]</b>                                                           | <b>3<sub>Bu</sub>[I]</b>                                                          |
|---------------------------------------------|-------------------------------------------------------------------------------------------------|-------------------------------------------------------------------------------------------------|-----------------------------------------------------------------------------------|
| Empirical formula                           | C <sub>47</sub> H <sub>56</sub> F <sub>6</sub> FeN <sub>7</sub> P <sub>3</sub> RuS <sub>2</sub> | C <sub>48</sub> H <sub>58</sub> F <sub>6</sub> FeN <sub>7</sub> P <sub>3</sub> RuS <sub>2</sub> | C <sub>52</sub> H <sub>66</sub> FeIN <sub>7</sub> P <sub>2</sub> RuS <sub>2</sub> |
| Formula weight                              | 1146.93                                                                                         | 1160.96                                                                                         | 1198.99                                                                           |
| Temperature/K                               | 293                                                                                             | 293                                                                                             | 293                                                                               |
| Crystal system                              | monoclinic                                                                                      | monoclinic                                                                                      | orthorhombic                                                                      |
| Space group                                 | P2 <sub>1</sub> /n                                                                              | P2 <sub>1</sub> /n                                                                              | P2 <sub>1</sub> 2 <sub>1</sub> 2 <sub>1</sub>                                     |
| a/Å                                         | 16.1976(4)                                                                                      | 16.1713(6)                                                                                      | 15.1864(3)                                                                        |
| b/Å                                         | 17.4678(5)                                                                                      | 17.1693(7)                                                                                      | 15.4588(3)                                                                        |
| c/Å                                         | 19.4441(4)                                                                                      | 19.7929(7)                                                                                      | 23.6654(6)                                                                        |
| α/°                                         | 90                                                                                              | 90                                                                                              | 90                                                                                |
| β/°                                         | 102.356(2)                                                                                      | 103.023(4)                                                                                      | 90                                                                                |
| γ/°                                         | 90                                                                                              | 90                                                                                              | 90                                                                                |
| Volume/Å <sup>3</sup>                       | 5374.0(2)                                                                                       | 5354.1(4)                                                                                       | 5555.8(2)                                                                         |
| Z                                           | 4                                                                                               | 4                                                                                               | 4                                                                                 |
| ρ <sub>calc</sub> /cm <sup>3</sup>          | 1.418                                                                                           | 1.440                                                                                           | 1.433                                                                             |
| μ/mm <sup>-1</sup>                          | 0.777                                                                                           | 0.781                                                                                           | 1.261                                                                             |
| F(000)                                      | 2352.0                                                                                          | 2384.0                                                                                          | 2448.0                                                                            |
| Crystal size/mm <sup>3</sup>                | 0.25 × 0.05 × 0.05                                                                              | 0.25 × 0.08 × 0.05                                                                              | 0.25 × 0.03 × 0.03                                                                |
| Radiation                                   | Mo Kα (λ = 0.71073)                                                                             | Mo Kα (λ = 0.71073)                                                                             | Mo Kα (λ = 0.71073)                                                               |
| 2θ range for data collection/°              | 4.362 to 54.968                                                                                 | 4.224 to 54.968                                                                                 | 3.186 to 54.96                                                                    |
| Index ranges                                | -21 ≤ h ≤ 21,<br>-22 ≤ k ≤ 22,<br>-25 ≤ l ≤ 25                                                  | -21 ≤ h ≤ 21,<br>-22 ≤ k ≤ 22,<br>-25 ≤ l ≤ 25                                                  | -19 ≤ h ≤ 19,<br>-20 ≤ k ≤ 20,<br>-30 ≤ l ≤ 30                                    |
| Reflections collected                       | 60158                                                                                           | 76593                                                                                           | 65078                                                                             |
| Independent reflections                     | 12248 [R <sub>int</sub> = 0.0236,<br>R <sub>sigma</sub> = 0.0152]                               | 12247 [R <sub>int</sub> = 0.0309,<br>R <sub>sigma</sub> = 0.0152]                               | 12739 [R <sub>int</sub> = 0.0467,<br>R <sub>sigma</sub> = 0.0353]                 |
| Data/restraints/parameters                  | 12248/44/596                                                                                    | 12247/19/626                                                                                    | 12739/302/605                                                                     |
| Goodness-of-fit on F <sup>2</sup>           | 1.022                                                                                           | 1.025                                                                                           | 1.041                                                                             |
| Final R indexes [I ≥ 2σ (I)]                | R <sub>1</sub> = 0.0458,<br>wR <sub>2</sub> = 0.1319                                            | R <sub>1</sub> = 0.0452,<br>wR <sub>2</sub> = 0.1267                                            | R <sub>1</sub> = 0.0458,<br>wR <sub>2</sub> = 0.0929                              |
| Final R indexes [all data]                  | R <sub>1</sub> = 0.0553,<br>wR <sub>2</sub> = 0.1396                                            | R <sub>1</sub> = 0.0538,<br>wR <sub>2</sub> = 0.1348                                            | R <sub>1</sub> = 0.0598,<br>wR <sub>2</sub> = 0.0982                              |
| Largest diff. peak/hole / e Å <sup>-3</sup> | 0.85/-0.60                                                                                      | 0.97/-0.52                                                                                      | 0.69/-0.26                                                                        |
| Flack parameter                             | -                                                                                               | -                                                                                               | 0.49(3)                                                                           |

$$R_1 = \Sigma (| |F_o| - |F_c| |) / \Sigma |F_o|; wR_2 = [\Sigma w (|F_o^2| - |F_c^2|)^2 / \Sigma w |F_o^2|^2]^{1/2}$$

**Table S5** Crystallographic data for complexes **CpRu(dppe)CN**, **CpMeRu(dppe)CN** and **CpMe<sub>5</sub>Ru(dppe)CN**.

|                                             | <b>CpRu(dppe)CN</b>                                                | <b>CpMeRu(dppe)CN</b>                                            | <b>CpMe<sub>5</sub>Ru(dppe)CN</b>                                  |
|---------------------------------------------|--------------------------------------------------------------------|------------------------------------------------------------------|--------------------------------------------------------------------|
| Empirical formula                           | C <sub>33</sub> H <sub>31</sub> Cl <sub>2</sub> NP <sub>2</sub> Ru | C <sub>33</sub> H <sub>31</sub> NP <sub>2</sub> Ru               | C <sub>38</sub> H <sub>41</sub> Cl <sub>2</sub> NP <sub>2</sub> Ru |
| Formula weight                              | 675.50                                                             | 604.60                                                           | 745.63                                                             |
| Temperature/K                               | 293.0                                                              | 293.0                                                            | 293.15                                                             |
| Crystal system                              | monoclinic                                                         | monoclinic                                                       | monoclinic                                                         |
| Space group                                 | P2 <sub>1</sub> /n                                                 | P2 <sub>1</sub>                                                  | P2 <sub>1</sub> /c                                                 |
| a/Å                                         | 12.923(2)                                                          | 9.8749(19)                                                       | 14.677(5)                                                          |
| b/Å                                         | 9.1065(14)                                                         | 15.155(3)                                                        | 12.168(4)                                                          |
| c/Å                                         | 25.677(4)                                                          | 9.9695(19)                                                       | 19.926(7)                                                          |
| α/°                                         | 90                                                                 | 90                                                               | 90                                                                 |
| β/°                                         | 90.032(3)                                                          | 109.836(3)                                                       | 100.380(6)                                                         |
| γ/°                                         | 90                                                                 | 90                                                               | 90                                                                 |
| Volume/Å <sup>3</sup>                       | 3021.8(8)                                                          | 1403.5(5)                                                        | 3500(2)                                                            |
| Z                                           | 4                                                                  | 2                                                                | 4                                                                  |
| ρ <sub>calc</sub> /cm <sup>3</sup>          | 1.485                                                              | 1.431                                                            | 1.415                                                              |
| μ/mm <sup>-1</sup>                          | 0.825                                                              | 0.695                                                            | 0.720                                                              |
| F(000)                                      | 1376.0                                                             | 620.0                                                            | 1536.0                                                             |
| Crystal size/mm <sup>3</sup>                | 0.25 × 0.25 × 0.22                                                 | 0.28 × 0.25 × 0.25                                               | 0.28 × 0.28 × 0.25                                                 |
| Radiation                                   | MoKα (λ = 0.71073)                                                 | MoKα (λ = 0.71073)                                               | MoKα (λ = 0.71073)                                                 |
| 2θ range for data collection/°              | 4.746 to 51.356                                                    | 5.692 to 51.362                                                  | 5.06 to 51.362                                                     |
| Index ranges                                | -15 ≤ h ≤ 15,<br>-10 ≤ k ≤ 11,<br>-30 ≤ l ≤ 31                     | -12 ≤ h ≤ 12,<br>-18 ≤ k ≤ 18,<br>-12 ≤ l ≤ 12                   | -17 ≤ h ≤ 17,<br>-14 ≤ k ≤ 14,<br>-24 ≤ l ≤ 24                     |
| Reflections collected                       | 27620                                                              | 18334                                                            | 45256                                                              |
| Independent reflections                     | 5691 [R <sub>int</sub> = 0.0412,<br>R <sub>sigma</sub> = 0.0364]   | 5282 [R <sub>int</sub> = 0.0233,<br>R <sub>sigma</sub> = 0.0211] | 6638 [R <sub>int</sub> = 0.0307,<br>R <sub>sigma</sub> = 0.0169]   |
| Data/restraints/parameters                  | 5691/0/352                                                         | 5282/1/336                                                       | 6638/0/402                                                         |
| Goodness-of-fit on F <sup>2</sup>           | 1.060                                                              | 1.051                                                            | 1.184                                                              |
| Final R indexes [I ≥ 2σ (I)]                | R <sub>1</sub> = 0.0337,<br>wR <sub>2</sub> = 0.0816               | R <sub>1</sub> = 0.0188,<br>wR <sub>2</sub> = 0.0460             | R <sub>1</sub> = 0.0338,<br>wR <sub>2</sub> = 0.0763               |
| Final R indexes [all data]                  | R <sub>1</sub> = 0.0364,<br>wR <sub>2</sub> = 0.0839               | R <sub>1</sub> = 0.0190,<br>wR <sub>2</sub> = 0.0461             | R <sub>1</sub> = 0.0346,<br>wR <sub>2</sub> = 0.0767               |
| Largest diff. peak/hole / e Å <sup>-3</sup> | 1.06/-0.71                                                         | 0.24/-0.25                                                       | 0.31/-0.50                                                         |
| Flack parameter                             | -                                                                  | 0.07(2)                                                          | -                                                                  |

$$R_1 = \Sigma (||F_o| - |F_c||) / \Sigma |F_o|; wR_2 = [\Sigma w (|F_o^2| - |F_c^2|)^2 / \Sigma w |F_o^2|^2]^{1/2}$$



### 3. IR spectra

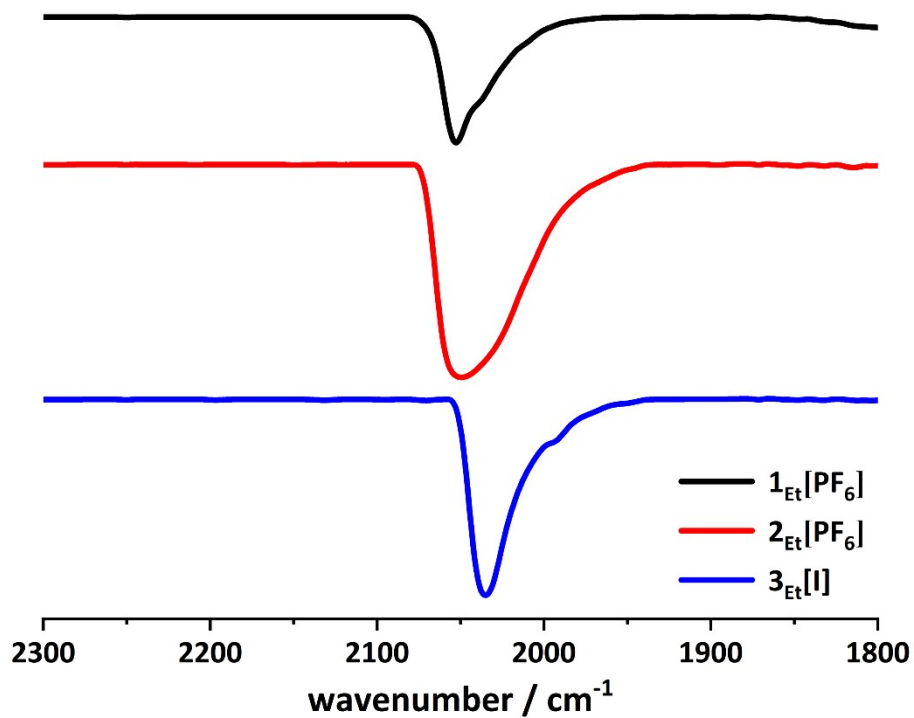

Fig. S2 Stretching frequencies of complexes  $1_{\text{Et}}[\text{PF}_6]$ ,  $2_{\text{Et}}[\text{PF}_6]$  and  $3_{\text{Et}}[\text{I}]$ .

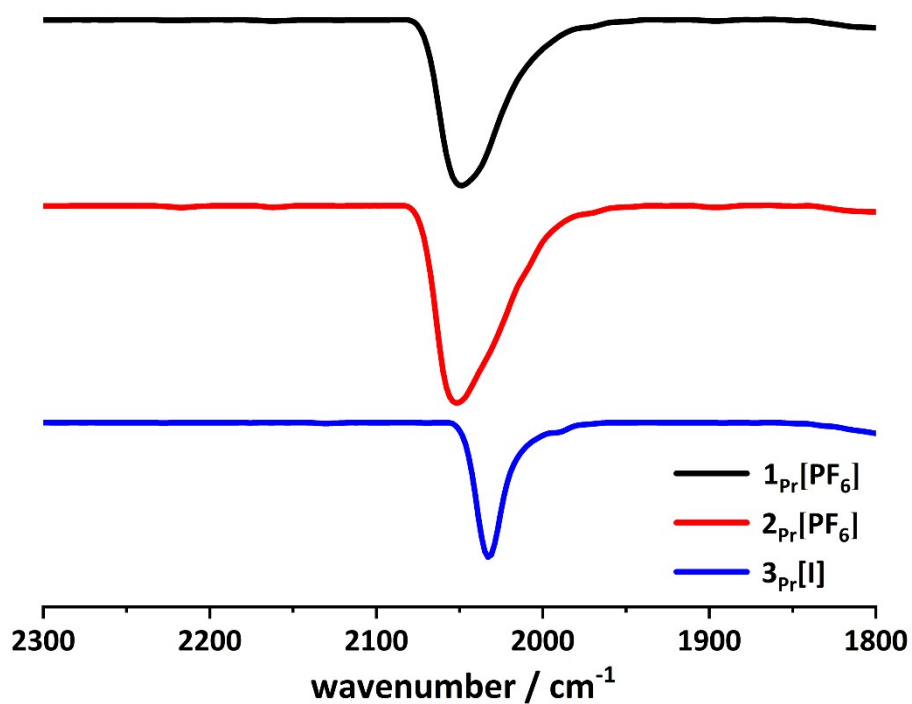

Fig. S3 Stretching frequencies of complexes  $1_{\text{Pr}}[\text{PF}_6]$ ,  $2_{\text{Pr}}[\text{PF}_6]$  and  $3_{\text{Pr}}[\text{I}]$ .

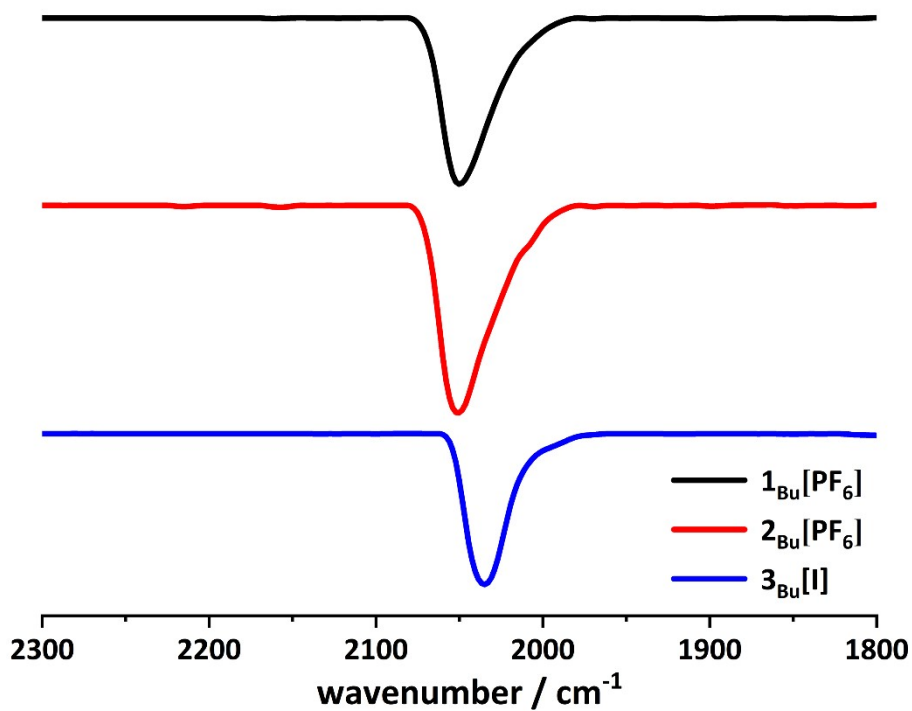

Fig. S4 Stretching frequencies of complexes 1<sub>Bu</sub>[PF<sub>6</sub>], 2<sub>Bu</sub>[PF<sub>6</sub>] and 3<sub>Bu</sub>[I].

#### 4. Magnetic properties

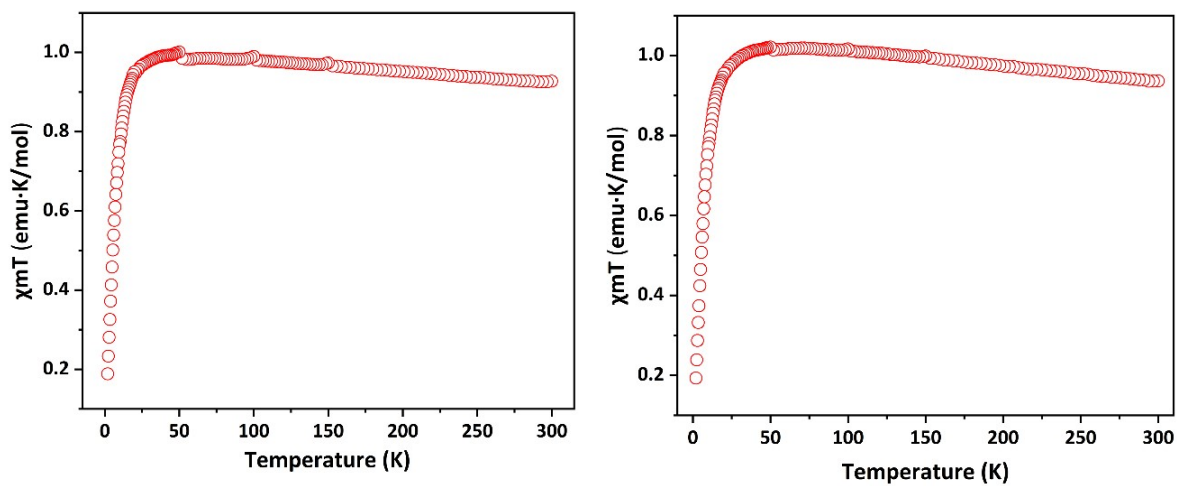

Fig. S5 The variable temperature magnetic susceptibility plots of complexes 1<sub>Me</sub>[PF<sub>6</sub>] (left) and 1<sub>Et</sub>[PF<sub>6</sub>] (right).

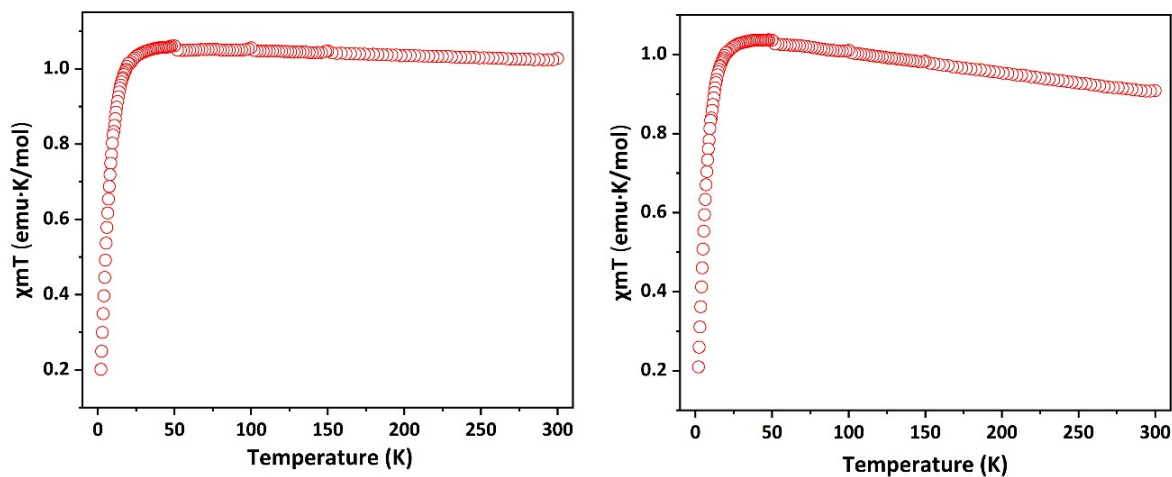

**Fig. S6** The variable temperature magnetic susceptibility plots of complexes **1<sub>Pr</sub>[PF<sub>6</sub>]** (left) and **1<sub>Bu</sub>[PF<sub>6</sub>]** (right).

## 5. UV-vis-NIR spectroscopy

**Table S6** The electronic absorption peaks of all bimetallic complexes.

| complex                               | LMCT (cm <sup>-1</sup> ) | ε (M <sup>-1</sup> cm <sup>-1</sup> ) | MMCT (cm <sup>-1</sup> ) | ε (M <sup>-1</sup> cm <sup>-1</sup> ) |
|---------------------------------------|--------------------------|---------------------------------------|--------------------------|---------------------------------------|
| <b>1<sub>Me</sub>[PF<sub>6</sub>]</b> | 10217                    | 1202                                  | 14071                    | 1075                                  |
| <b>1<sub>Et</sub>[PF<sub>6</sub>]</b> | 10209                    | 1308                                  | 14124                    | 1114                                  |
| <b>1<sub>Pr</sub>[PF<sub>6</sub>]</b> | 10205                    | 1282                                  | 14146                    | 1068                                  |
| <b>1<sub>Bu</sub>[PF<sub>6</sub>]</b> | 10202                    | 1345                                  | 14058                    | 1131                                  |
| <b>2<sub>Me</sub>[PF<sub>6</sub>]</b> | 10393                    | 1419                                  | 13791                    | 1131                                  |
| <b>2<sub>Et</sub>[PF<sub>6</sub>]</b> | 10383                    | 1325                                  | 14037                    | 1261                                  |
| <b>2<sub>Pr</sub>[PF<sub>6</sub>]</b> | 10368                    | 1287                                  | 14043                    | 1219                                  |
| <b>2<sub>Bu</sub>[PF<sub>6</sub>]</b> | 10342                    | 1350                                  | 14032                    | 1276                                  |
| <b>3<sub>Me</sub>[I]</b>              | 10445                    | 1190                                  | 13667                    | 1118                                  |
| <b>3<sub>Et</sub>[I]</b>              | 10416                    | 1403                                  | 13705                    | 1264                                  |
| <b>3<sub>Pr</sub>[I]</b>              | 10408                    | 1410                                  | 13675                    | 1265                                  |
| <b>3<sub>Bu</sub>[I]</b>              | 10402                    | 1400                                  | 13662                    | 1249                                  |

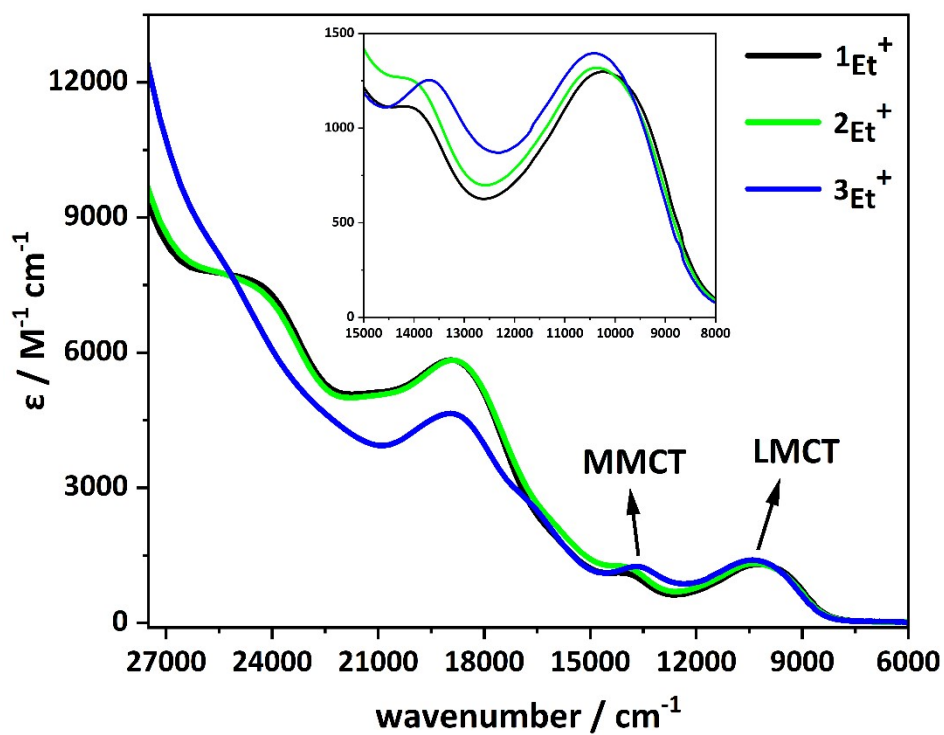

Fig. S7 The UV-vis-NIR spectra of complexes  $1_{Et}^+$ ,  $2_{Et}^+$  and  $3_{Et}^+$  in  $CH_2Cl_2$  solution.

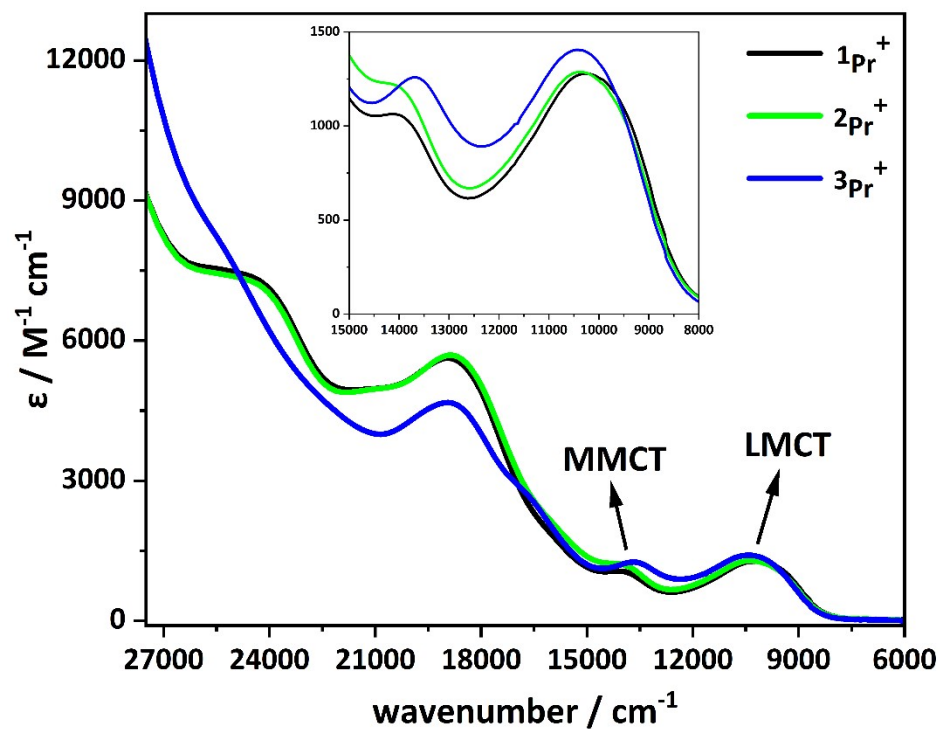

Fig. S8 The UV-vis-NIR spectra of complexes  $1_{Pr}^+$ ,  $2_{Pr}^+$  and  $3_{Pr}^+$  in  $CH_2Cl_2$  solution.

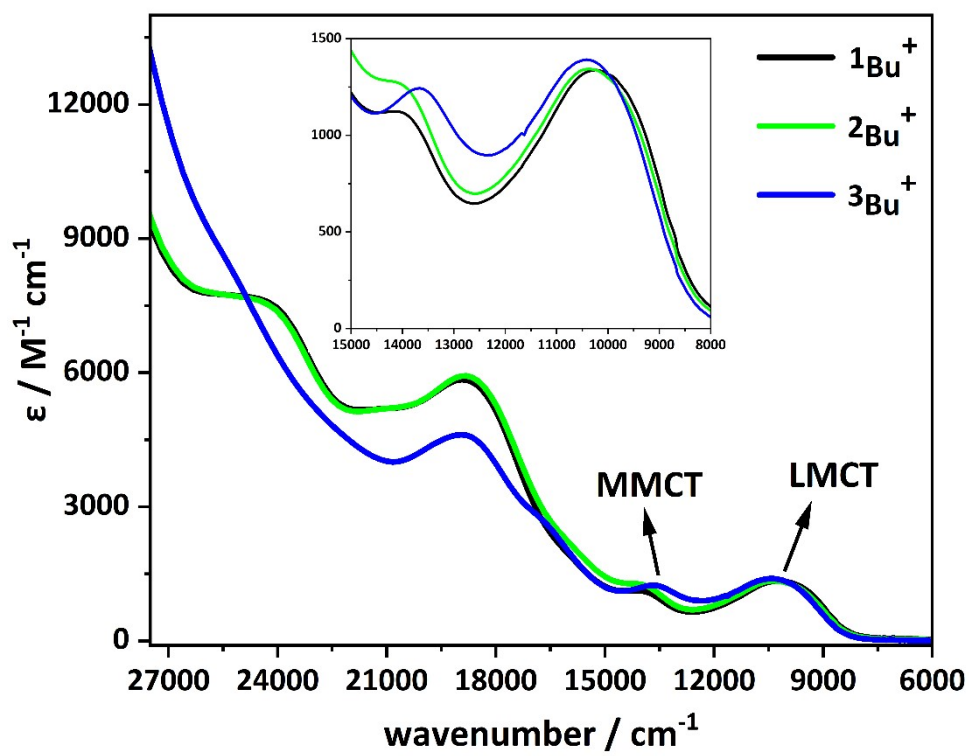

Fig. S9 The UV-vis-NIR spectra of complexes  $1_{\text{Bu}}^+$ ,  $2_{\text{Bu}}^+$  and  $3_{\text{Bu}}^+$  in  $\text{CH}_2\text{Cl}_2$  solution.

## 6. TDDFT calculations

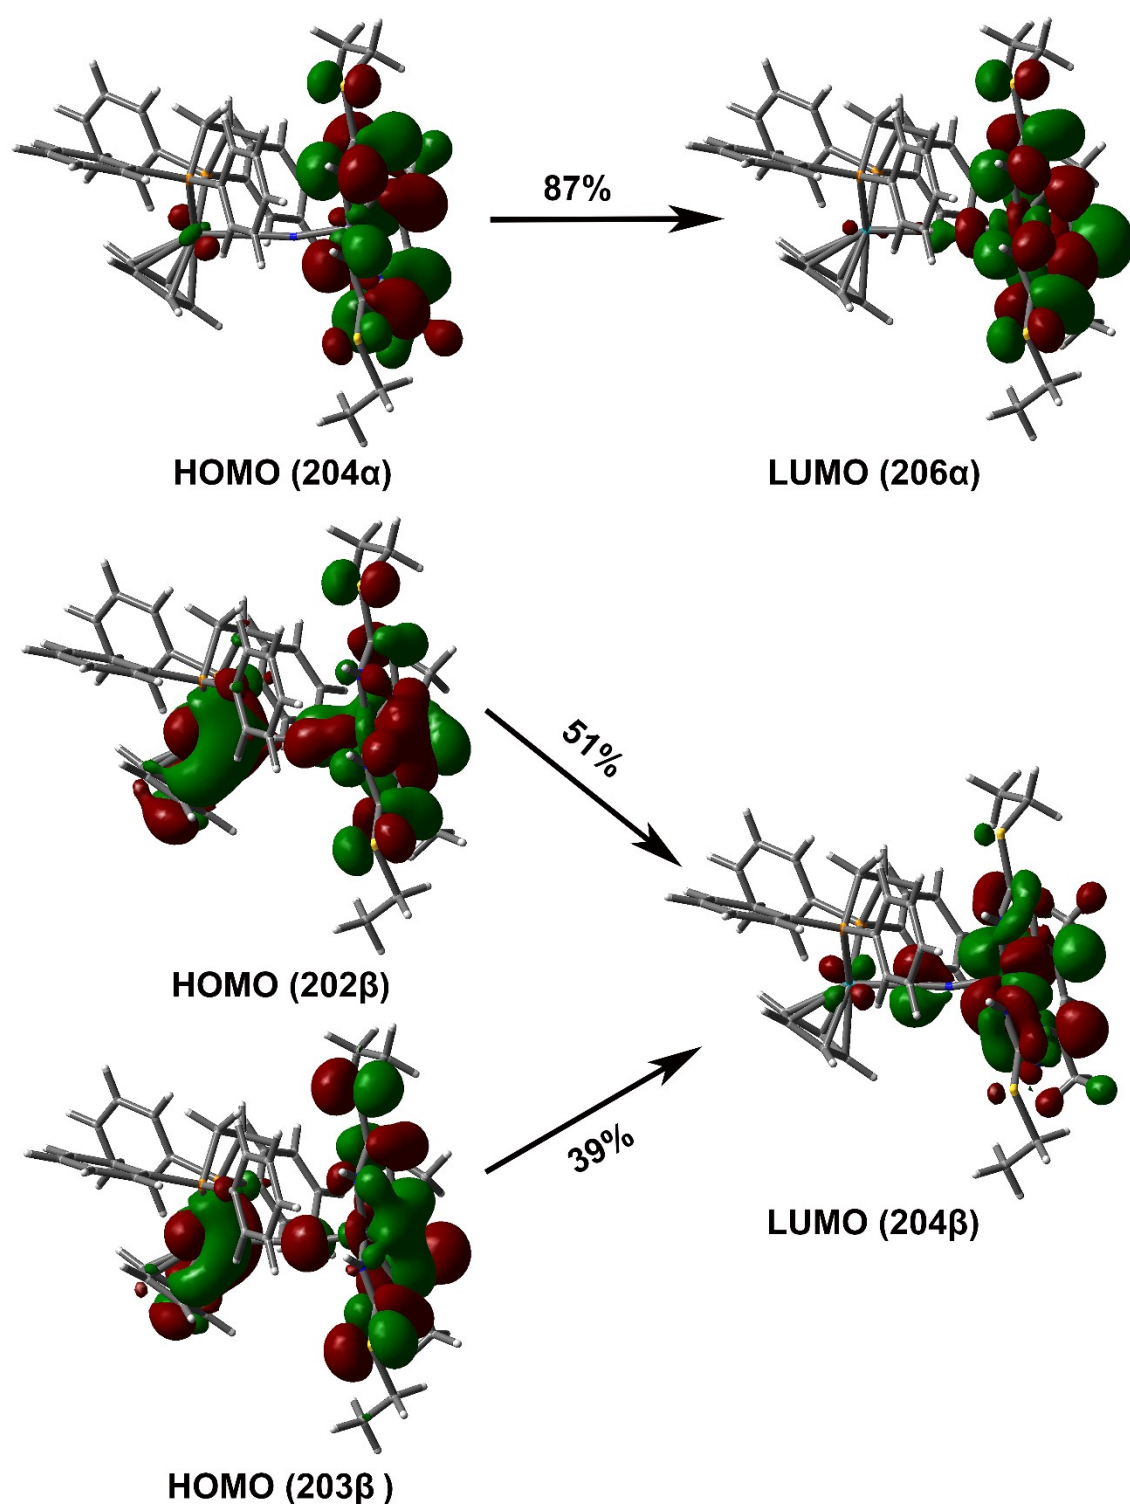

**Fig. S10** Molecular orbital diagrams for the major electronic transitions corresponding to the LMCT ( $\lambda = 1003$  nm,  $f = 0.0370$ ) (top) and MMCT band ( $\lambda = 587$  nm,  $f = 0.0138$ ) (below) of complex  $1_{Et}[PF_6]$ .

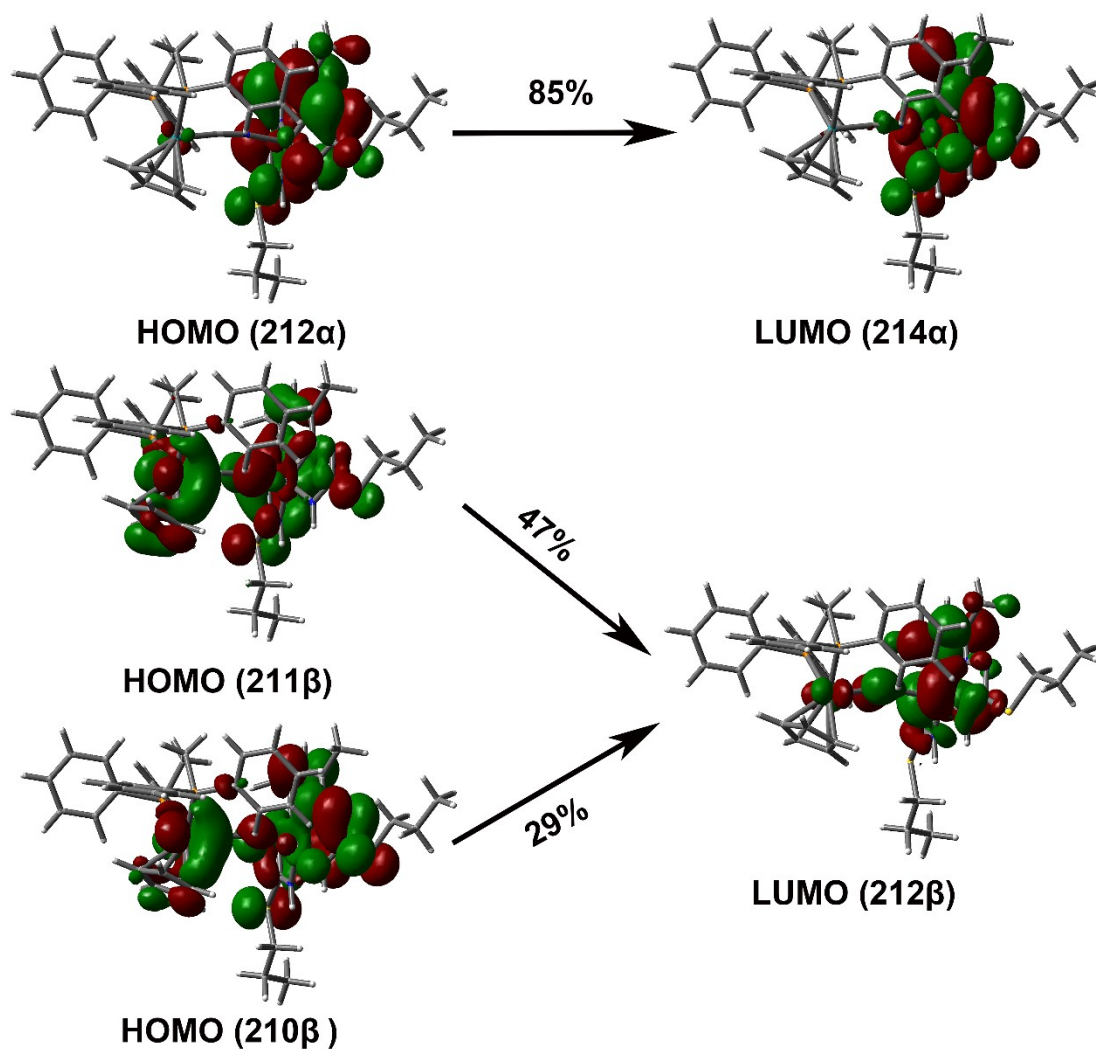

**Fig. S11** Molecular orbital diagrams for the major electronic transitions corresponding to the LMCT ( $\lambda = 1021$  nm,  $f = 0.0401$ ) (top) and MMCT band ( $\lambda = 597$  nm,  $f = 0.0682$ ) (below) of complex  $1_{Pr}[PF_6]$ .

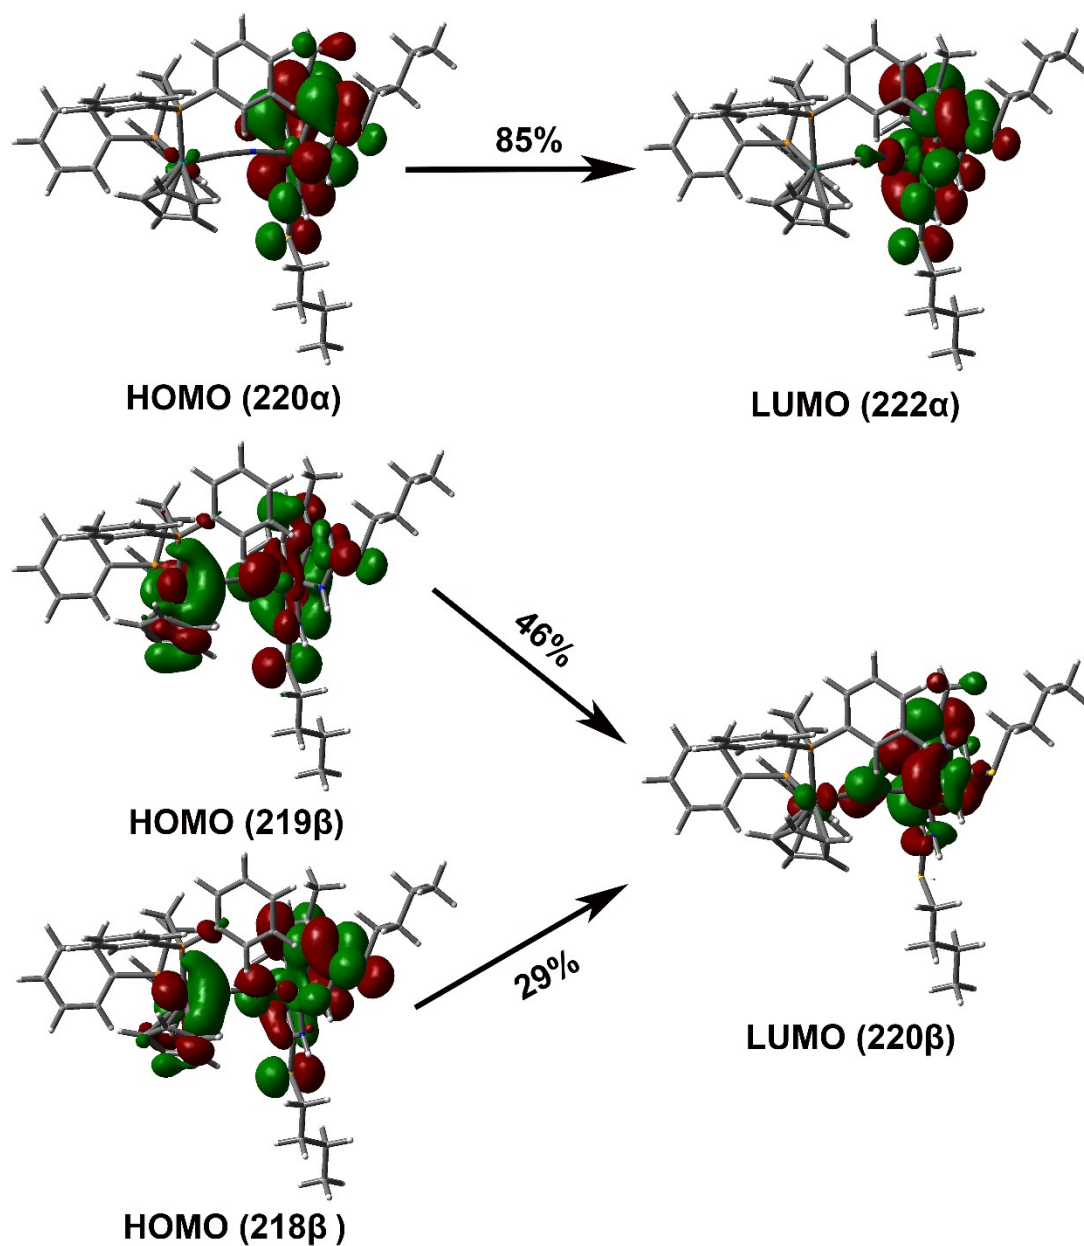

**Fig. S12** Molecular orbital diagrams for the major electronic transitions corresponding to the LMCT ( $\lambda = 1022$  nm,  $f = 0.0408$ ) (top) and MMCT band ( $\lambda = 597$  nm,  $f = 0.0674$ ) (below) of complex  $1_{\text{Bu}}[\text{PF}_6]$ .



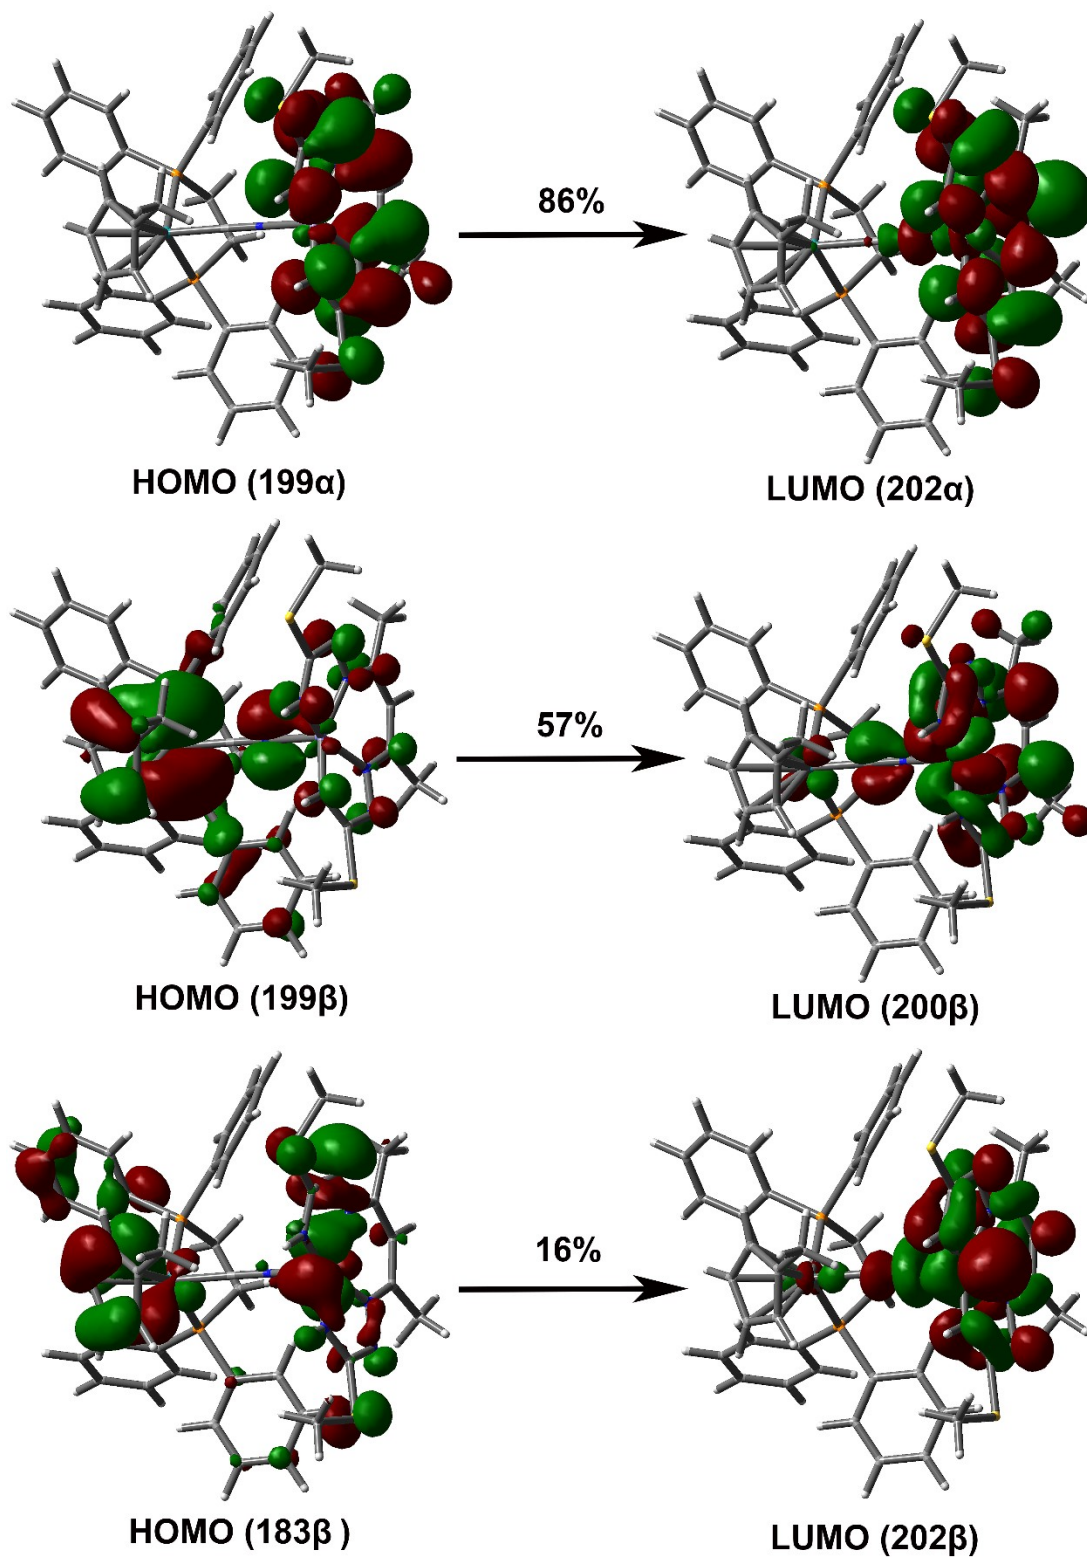

**Fig. S13** Molecular orbital diagrams for the major electronic transitions corresponding to the LMCT ( $\lambda = 1015$  nm,  $f = 0.0361$ ) (top) and MMCT band ( $\lambda = 626$  nm,  $f = 0.0439$ ) (middle and below) of complex **2<sub>Me</sub>[PF<sub>6</sub>]**.

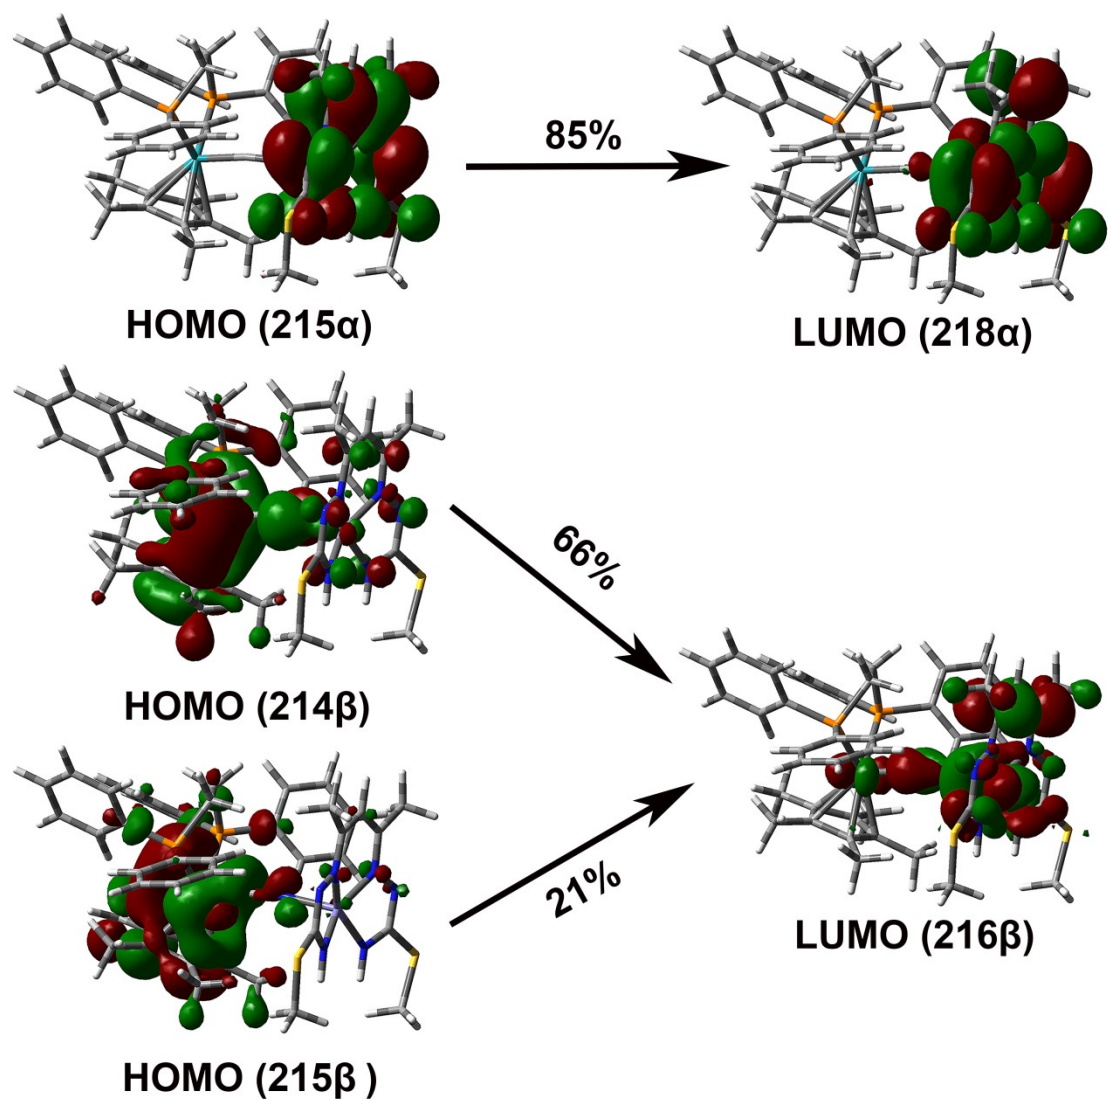

**Fig. S14** Molecular orbital diagrams for the major electronic transitions corresponding to the LMCT ( $\lambda = 1010$  nm,  $f = 0.0372$ ) (top) and MMCT band ( $\lambda = 667$  nm,  $f = 0.0473$ ) (below) of complex **3<sub>Me</sub>[I]**.

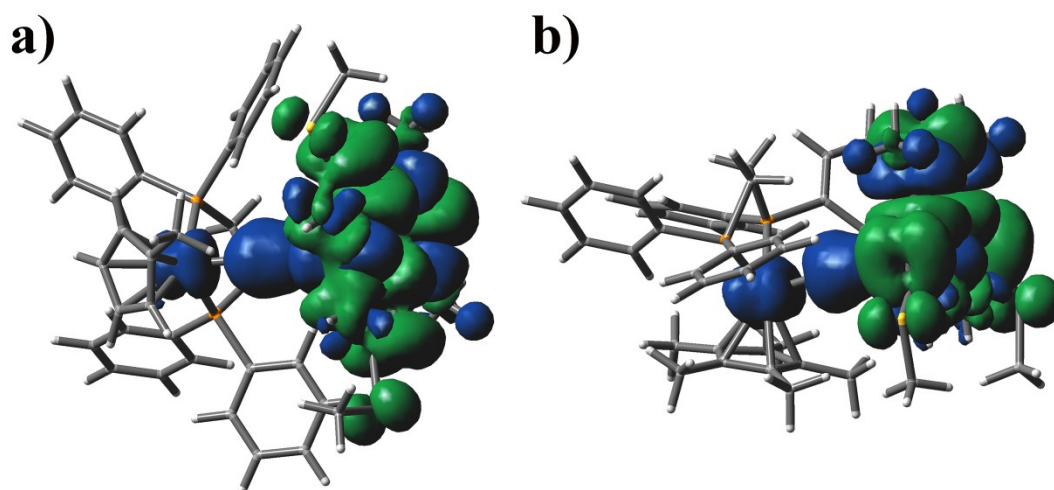

**Fig. S15** The computed spin density distribution of  $2_{Me}[PF_6]$  ( Ru<sup>II</sup>, 0.1467; Fe<sup>III</sup>, 2.5405;  $(L^*_{Me})^{2-}$ , -0.6872) (left) and  $3_{Me}[I]$  ( Ru<sup>II</sup>, 0.1570; Fe<sup>III</sup>, 2.5338;  $(L^*_{Me})^{2-}$ , -0.6907) (right).

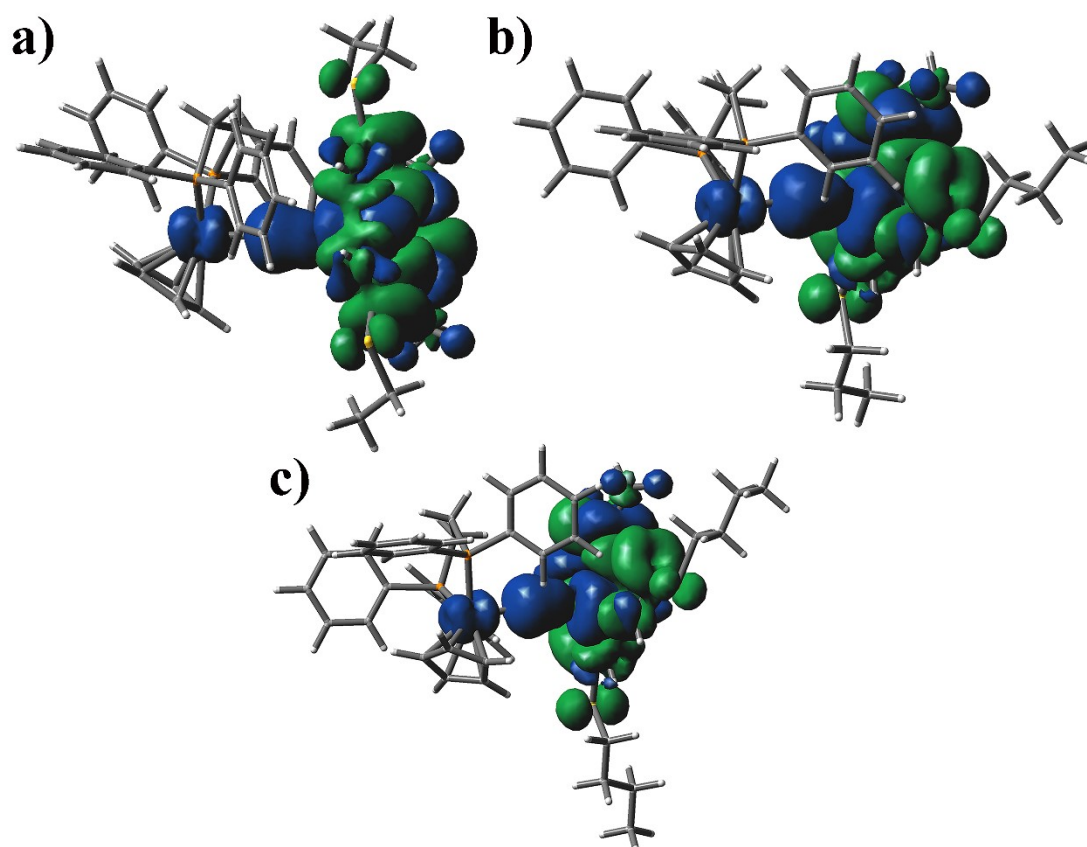

**Fig. S16** The computed spin density distribution of  $1_{Et}[PF_6]$  (a, Ru<sup>II</sup>, 0.1381; Fe<sup>III</sup>, 2.5379;  $(L^*_{Et})^{2-}$ , -0.6760),  $1_{Pr}[PF_6]$  (b, Ru<sup>II</sup>, 0.1393; Fe<sup>III</sup>, 2.5459;  $(L^*_{Pr})^{2-}$ , -0.6852) and  $1_{Bu}[PF_6]$  (c, Ru<sup>II</sup>, 0.1390; Fe<sup>III</sup>, 2.5456;  $(L^*_{Bu})^{2-}$ , -0.6846)

### Optimized Cartesian Coordinates of complex $1_{\text{Me}^+}$

| Atom | X         | Y         | Z         | Atom | X         | Y         | Z         |
|------|-----------|-----------|-----------|------|-----------|-----------|-----------|
| Ru   | -1.488125 | 0.000979  | 1.375916  | C    | 2.921188  | 0.437353  | -2.880926 |
| Fe   | 3.351863  | -0.073686 | -0.227317 | C    | 0.060792  | -5.534478 | -1.126953 |
| P    | -2.288307 | -1.547844 | -0.286787 | H    | 0.589178  | -6.467436 | -1.306764 |
| P    | -1.81547  | 1.63047   | -0.358774 | C    | -0.843646 | 0.240067  | 3.591859  |
| S    | 5.360682  | 1.574954  | 3.479615  | H    | 0.188216  | 0.390338  | 3.878289  |
| S    | 2.463679  | 1.181804  | -4.481002 | C    | -5.098588 | 4.022337  | 0.560838  |
| N    | 4.341904  | -1.239645 | 0.962826  | H    | -5.383415 | 4.666032  | 1.389021  |
| N    | 4.095843  | 1.236766  | 0.962565  | C    | 3.369299  | -3.598655 | -2.738598 |
| H    | 3.999543  | 2.247168  | 0.908145  | H    | 2.33564   | -3.500299 | -3.090424 |
| N    | 4.859368  | -0.65525  | 2.104083  | H    | 3.569526  | -4.644272 | -2.490319 |
| N    | 1.498615  | -0.298326 | 0.418233  | H    | 4.008794  | -3.295834 | -3.57598  |
| N    | 3.410155  | -1.370515 | -1.667232 | C    | -5.111767 | -1.232528 | -0.02103  |
| N    | 3.115167  | 1.103253  | -1.723719 | H    | -4.925033 | -0.18034  | -0.223616 |
| H    | 2.98769   | 2.111907  | -1.699455 | C    | -5.95589  | 3.878118  | -0.548647 |
| N    | 3.064242  | -0.904001 | -2.924491 | H    | -6.904789 | 4.406979  | -0.578351 |
| C    | 4.696789  | 0.683612  | 2.036508  | C    | -6.42932  | -1.652359 | 0.233824  |
| C    | 0.348983  | -0.202882 | 0.741396  | H    | -7.239643 | -0.928347 | 0.206371  |
| C    | -3.48081  | 2.504396  | -0.474116 | C    | 0.437468  | 3.229347  | 0.396339  |
| C    | -1.623572 | 0.677775  | -1.997351 | H    | 0.561915  | 2.502219  | 1.193204  |
| H    | -1.918505 | 1.304182  | -2.847055 | C    | 5.051883  | -3.363499 | 2.014591  |
| H    | -0.549539 | 0.484298  | -2.089733 | H    | 5.051145  | -4.436761 | 1.80588   |
| C    | -4.047878 | -2.162993 | 0.004021  | H    | 4.495893  | -3.168743 | 2.939154  |
| C    | 3.608132  | -2.708245 | -1.543126 | H    | 6.080442  | -3.034794 | 2.205694  |
| C    | -1.32971  | -3.122555 | -0.649687 | C    | -3.067129 | 0.634182  | 2.987696  |
| C    | -3.872219 | 3.337227  | 0.598725  | H    | -3.997205 | 1.137342  | 2.765799  |
| H    | -3.216732 | 3.466365  | 1.456983  | C    | -4.319481 | -3.513279 | 0.308208  |
| C    | -2.414146 | -0.645785 | -1.983831 | H    | -3.516758 | -4.243987 | 0.338483  |
| H    | -2.034127 | -1.317384 | -2.760053 | C    | -1.794471 | 1.272815  | 3.29156   |
| H    | -3.478444 | -0.478492 | -2.177178 | H    | -1.615571 | 2.336975  | 3.359406  |
| C    | -0.323554 | -3.548713 | 0.239251  | C    | -6.697781 | -3.003448 | 0.530477  |

|   |           |           |           |   |           |           |           |
|---|-----------|-----------|-----------|---|-----------|-----------|-----------|
| H | -0.077911 | -2.94181  | 1.105365  | H | -7.715859 | -3.32744  | 0.729775  |
| C | -2.880379 | -0.77949  | 3.09334   | C | -5.573187 | 3.050876  | -1.619753 |
| H | -3.641246 | -1.529739 | 2.928133  | H | -6.225079 | 2.938922  | -2.482348 |
| C | 0.366777  | -4.753166 | 0.002452  | C | 1.315764  | 4.326186  | 0.290893  |
| H | 1.13483   | -5.077988 | 0.699867  | H | 2.106383  | 4.45908   | 1.026644  |
| C | -0.615283 | 3.07534   | -0.52767  | C | -0.781807 | 4.027578  | -1.557962 |
| C | -1.636557 | -3.91027  | -1.782606 | H | -1.60937  | 3.941575  | -2.258403 |
| H | -2.426537 | -3.611309 | -2.468225 | C | 0.101674  | 5.116998  | -1.667783 |
| C | 4.457173  | -2.590965 | 0.86119   | H | -0.041422 | 5.851866  | -2.455818 |
| C | -4.340603 | 2.368339  | -1.58418  | C | -5.639586 | -3.929678 | 0.570474  |
| H | -4.06726  | 1.746491  | -2.431888 | H | -5.836731 | -4.973109 | 0.802439  |
| C | 4.067131  | -3.257394 | -0.322331 | C | 2.646993  | 3.017931  | -4.09477  |
| H | 4.195414  | -4.334647 | -0.315242 | H | 3.66635   | 3.236946  | -3.766972 |
| C | -0.940783 | -5.108236 | -2.022663 | H | 1.909605  | 3.344784  | -3.357503 |
| H | -1.186114 | -5.70959  | -2.89412  | H | 2.458306  | 3.528131  | -5.04232  |
| C | -1.500629 | -1.040181 | 3.44622   | C | 5.101339  | 3.364871  | 2.954347  |
| H | -1.069832 | -2.006885 | 3.663886  | H | 5.647847  | 3.580521  | 2.032401  |
| C | 1.152615  | 5.270527  | -0.740562 | H | 5.520088  | 3.964537  | 3.765759  |
| H | 1.82112   | 6.124911  | -0.812283 | H | 4.036711  | 3.594454  | 2.855051  |

### Optimized Cartesian Coordinates of complex $1_{Et}^+$

| Atom | X         | Y         | Z         | Atom | X         | Y         | Z         |
|------|-----------|-----------|-----------|------|-----------|-----------|-----------|
| Ru   | 1.480552  | 0.731492  | -1.432398 | C    | -4.183673 | -2.942118 | -0.885825 |
| Fe   | -3.070434 | -0.241712 | 0.561482  | H    | -4.450852 | -3.836672 | -1.438717 |
| P    | 2.316332  | -1.329019 | -0.528738 | C    | -1.442026 | 4.00416   | 1.436639  |
| P    | 1.886241  | 1.58413   | 0.78243   | H    | -2.136121 | 4.558041  | 0.808671  |
| S    | -1.258748 | -1.32413  | 4.516513  | C    | 1.975992  | -1.251992 | 1.344456  |
| S    | -5.394463 | 3.286901  | -0.924779 | H    | 0.904477  | -1.454158 | 1.444232  |
| N    | -4.427781 | -0.548121 | -0.792155 | H    | 2.51136   | -2.058053 | 1.859806  |
| N    | -1.420208 | -0.081315 | -0.507934 | C    | 2.005746  | 0.470375  | -3.674019 |
| N    | -3.039208 | -2.117934 | 1.066564  | H    | 2.093933  | -0.484671 | -4.172908 |
| N    | -2.398005 | -2.418307 | 2.263018  | C    | 0.405614  | 2.62033   | 3.045249  |
| N    | -2.394063 | -0.079549 | 2.337413  | H    | 1.126034  | 2.119046  | 3.686353  |

|   |           |           |           |   |           |           |           |
|---|-----------|-----------|-----------|---|-----------|-----------|-----------|
| N | -5.066126 | 0.576896  | -1.285766 | C | 6.415473  | -1.934375 | 0.215654  |
| N | -3.827268 | 1.503743  | 0.46522   | H | 7.083477  | -1.936215 | 1.073218  |
| C | -0.309053 | 0.21398   | -0.845062 | C | -5.606193 | -1.746433 | -2.611106 |
| C | -2.087901 | -1.268442 | 2.897303  | H | -5.221505 | -1.077847 | -3.389985 |
| C | 1.560557  | -2.96975  | -1.056493 | H | -6.603158 | -1.372298 | -2.348465 |
| C | -3.433667 | -3.161196 | 0.29711   | H | -5.700471 | -2.758017 | -3.014898 |
| C | -4.701699 | -1.732892 | -1.401126 | C | 3.375627  | 2.727706  | 0.966095  |
| C | 4.160056  | -1.673795 | -0.698261 | C | -1.54284  | 4.078236  | 2.839993  |
| C | 4.67254   | -1.940799 | -1.98846  | H | -2.320624 | 4.680615  | 3.302622  |
| H | 4.004721  | -1.964611 | -2.846647 | C | -0.619194 | 3.378882  | 3.643316  |
| C | -4.696773 | 1.653378  | -0.553743 | H | -0.682548 | 3.439595  | 4.726548  |
| C | 0.813917  | 1.266222  | -3.588556 | C | 4.63976   | 2.255904  | 0.543284  |
| H | -0.159493 | 0.992611  | -3.97171  | H | 4.744474  | 1.258457  | 0.122181  |
| C | 0.46001   | -2.991749 | -1.936042 | C | 0.431252  | -5.431377 | -1.853133 |
| H | 0.045491  | -2.059047 | -2.30595  | H | 0.003115  | -6.380138 | -2.167112 |
| C | 1.135975  | 2.49645   | -2.900344 | C | 1.531959  | -5.411905 | -0.972808 |
| H | 0.468237  | 3.330852  | -2.740316 | H | 1.953456  | -6.344274 | -0.606    |
| C | -0.101216 | -4.220658 | -2.333841 | C | 3.262309  | 4.036112  | 1.47876   |
| H | -0.944157 | -4.229736 | -3.02048  | H | 2.300566  | 4.420992  | 1.803761  |
| C | 5.04273   | -1.674658 | 0.401886  | C | -1.235343 | -3.194098 | 4.907134  |
| H | 4.682089  | -1.488532 | 1.409435  | H | -1.188214 | -3.218028 | 6.000311  |
| C | -0.429911 | 3.226935  | 0.84061   | H | -2.199386 | -3.584644 | 4.575927  |
| H | -0.369425 | 3.152487  | -0.2412   | C | 5.775771  | 3.077295  | 0.648833  |
| C | 2.097613  | -4.186292 | -0.578908 | H | 6.74326   | 2.702735  | 0.324361  |
| H | 2.964419  | -4.185678 | 0.078098  | C | -6.471522 | 2.939708  | -2.463842 |
| C | -3.098531 | -4.568678 | 0.730725  | H | -6.985805 | 1.997064  | -2.268158 |
| H | -3.481354 | -5.298389 | 0.012352  | H | -7.194709 | 3.761014  | -2.448699 |
| H | -3.525979 | -4.778675 | 1.718253  | C | 4.401564  | 4.859802  | 1.575996  |
| H | -2.013336 | -4.692221 | 0.827038  | H | 4.302877  | 5.867168  | 1.972118  |
| C | 6.040487  | -2.203097 | -2.173999 | C | -5.662416 | 2.898035  | -3.763581 |
| H | 6.419044  | -2.415355 | -3.170499 | H | -4.939448 | 2.075781  | -3.744968 |
| C | 2.551731  | 2.464016  | -2.597425 | H | -5.125314 | 3.837822  | -3.934396 |
| H | 3.107903  | 3.245304  | -2.097799 | H | -6.342505 | 2.736759  | -4.61152  |
| C | 3.090807  | 1.223959  | -3.062452 | C | 5.659791  | 4.383397  | 1.165563  |
| H | 4.125761  | 0.918392  | -3.006797 | H | 6.537246  | 5.019963  | 1.243537  |

|   |          |           |           |   |           |           |          |
|---|----------|-----------|-----------|---|-----------|-----------|----------|
| C | 2.328325 | 0.120074  | 1.953298  | C | -0.062486 | -3.933147 | 4.256178 |
| H | 3.400716 | 0.206046  | 2.154746  | H | -0.08514  | -4.989843 | 4.557006 |
| H | 1.800652 | 0.247061  | 2.903472  | H | 0.900857  | -3.513942 | 4.569616 |
| C | 6.918452 | -2.196954 | -1.071186 | H | -0.135349 | -3.887369 | 3.1648   |
| H | 7.976387 | -2.400624 | -1.213782 | H | -2.168366 | 0.774977  | 2.844125 |
| C | 0.503216 | 2.53349   | 1.638874  | H | -3.55593  | 2.321971  | 1.007262 |

### Optimized Cartesian Coordinates of complex $1_{Pr}^+$

| Atom | X         | Y         | Z         | Atom | X         | Y         | Z         |
|------|-----------|-----------|-----------|------|-----------|-----------|-----------|
| Ru   | 1.846021  | -0.055128 | -1.160161 | H    | 5.080244  | -0.257712 | 2.525392  |
| Fe   | -3.057547 | -0.524691 | 0.159967  | C    | 2.075482  | -4.698764 | 2.9282    |
| P    | 2.337125  | 1.952047  | 0.080895  | H    | 2.555545  | -5.227079 | 3.747974  |
| P    | 2.717661  | -1.163387 | 0.793405  | C    | 0.924559  | -5.236462 | 2.317225  |
| S    | -3.461034 | -4.903719 | -0.926609 | H    | 0.513751  | -6.180549 | 2.666194  |
| S    | -4.913306 | 3.281306  | -1.328182 | C    | 5.088497  | -2.431032 | -0.124079 |
| N    | -3.014608 | -1.897239 | 1.532632  | H    | 4.426046  | -2.906474 | -0.843319 |
| N    | -3.516533 | 0.845595  | 1.458421  | C    | 2.613187  | -3.482742 | 2.47119   |
| N    | -4.023988 | 2.034694  | 0.949201  | H    | 3.51655   | -3.092106 | 2.933635  |
| N    | -1.119553 | -0.244872 | -0.112651 | C    | 0.313134  | -4.552882 | 1.250124  |
| N    | -3.068705 | -3.205577 | 1.096375  | H    | -0.576916 | -4.959493 | 0.778825  |
| N    | -3.907633 | 0.735076  | -0.992272 | C    | -2.496522 | -2.890943 | 3.740993  |
| H    | -4.10731  | 0.649391  | -1.986839 | H    | -2.299169 | -2.575373 | 4.769155  |
| N    | -3.464609 | -2.06999  | -0.908318 | H    | -1.637541 | -3.454768 | 3.359348  |
| H    | -3.687962 | -2.096598 | -1.899623 | H    | -3.346711 | -3.58364  | 3.734119  |
| C    | 0.030942  | -0.15122  | -0.436953 | C    | -3.412498 | 2.067661  | 3.605389  |
| C    | 1.043592  | 3.299066  | 0.291313  | H    | -2.820454 | 2.885906  | 3.179206  |
| C    | 3.844079  | 2.897898  | -0.549922 | H    | -3.110242 | 1.898846  | 4.642471  |
| C    | 1.251966  | 4.355377  | 1.207829  | H    | -4.457245 | 2.400903  | 3.586917  |
| H    | 2.160584  | 4.400217  | 1.804546  | C    | -3.884997 | -4.528894 | -2.747343 |
| C    | -2.780925 | -1.698513 | 2.859464  | H    | -4.812325 | -3.944734 | -2.763916 |
| C    | -0.125106 | 3.283534  | -0.494403 | H    | -3.05911  | -3.944669 | -3.168594 |
| H    | -0.293789 | 2.470601  | -1.19376  | C    | 7.32914   | -2.161774 | 0.802284  |
| C    | 1.998706  | -2.792561 | 1.401778  | H    | 8.387462  | -2.408698 | 0.79481   |

|   |           |           |           |   |           |           |           |
|---|-----------|-----------|-----------|---|-----------|-----------|-----------|
| C | 3.719419  | 4.170289  | -1.146285 | C | 2.831193  | 0.684693  | -3.154385 |
| H | 2.749886  | 4.654978  | -1.212571 | H | 3.324338  | 1.643465  | -3.236167 |
| C | 2.835645  | 1.482261  | 1.88071   | C | 6.819223  | -1.260158 | 1.753542  |
| H | 3.919169  | 1.615722  | 1.95755   | H | 7.481933  | -0.808657 | 2.487475  |
| H | 2.361984  | 2.194484  | 2.563644  | C | 6.45685   | -2.75079  | -0.135128 |
| C | -3.326011 | -3.227864 | -0.232991 | H | 6.840009  | -3.457725 | -0.866473 |
| C | 4.855049  | 4.82975   | -1.656296 | C | 1.199543  | -0.978901 | -3.186459 |
| H | 4.746204  | 5.810629  | -2.111892 | H | 0.256461  | -1.492952 | -3.30874  |
| C | 4.568402  | -1.523278 | 0.826358  | C | 1.426422  | 0.437197  | -3.387671 |
| C | 6.123308  | 4.226093  | -1.574823 | H | 0.701766  | 1.1578    | -3.738678 |
| H | 6.998867  | 4.738055  | -1.965391 | C | 3.460735  | -0.547156 | -2.784554 |
| C | -3.245329 | 0.810147  | 2.785163  | H | 4.51177   | -0.687381 | -2.577767 |
| C | -1.078002 | 4.313289  | -0.368942 | C | 2.441379  | -1.584708 | -2.800962 |
| H | -1.97643  | 4.291312  | -0.980142 | H | 2.598393  | -2.638867 | -2.619494 |
| C | 0.298343  | 5.3801    | 1.336659  | C | -4.063079 | -5.850362 | -3.519026 |
| H | 0.469487  | 6.191382  | 2.039573  | H | -4.160031 | -5.587982 | -4.582556 |
| C | -4.221112 | 1.89787   | -0.376542 | H | -3.149953 | -6.455136 | -3.431347 |
| C | -2.849932 | -0.400211 | 3.409386  | C | -5.292709 | -6.675085 | -3.084253 |
| H | -2.644876 | -0.331256 | 4.47264   | H | -5.38718  | -7.574681 | -3.703781 |
| C | 2.41803   | 0.042347  | 2.237545  | H | -6.217085 | -6.092735 | -3.194744 |
| H | 1.340428  | -0.012332 | 2.428206  | H | -5.219761 | -6.994316 | -2.03787  |
| H | 2.929993  | -0.308208 | 3.141381  | C | -5.434763 | 4.493355  | 0.055718  |
| C | 0.84927   | -3.333306 | 0.792198  | H | -6.144255 | 3.95902   | 0.692268  |
| H | 0.375315  | -2.80806  | -0.031124 | H | -4.538109 | 4.723258  | 0.635977  |
| C | 6.250762  | 2.952247  | -0.986446 | C | -6.058223 | 5.74221   | -0.585467 |
| H | 7.225445  | 2.475063  | -0.923801 | H | -5.33246  | 6.222959  | -1.255975 |
| C | 5.117668  | 2.288357  | -0.483504 | H | -6.922807 | 5.455519  | -1.199126 |
| H | 5.237482  | 1.295819  | -0.055564 | C | -6.507515 | 6.749016  | 0.497939  |
| C | -0.868131 | 5.361595  | 0.545366  | H | -5.660576 | 7.077053  | 1.115185  |
| H | -1.600083 | 6.160083  | 0.639234  | H | -7.261315 | 6.307929  | 1.162929  |
| C | 5.445746  | -0.944198 | 1.767172  | H | -6.94952  | 7.639002  | 0.034342  |

**Optimized Cartesian Coordinates of complex  $1_{Bu}^+$**



| Atom | X         | Y         | Z         | Atom | X         | Y         | Z         |
|------|-----------|-----------|-----------|------|-----------|-----------|-----------|
| Ru   | 2.009182  | 0.051834  | -1.164517 | H    | 4.83522   | -2.531673 | -0.770873 |
| Fe   | -2.79755  | -0.747948 | 0.351506  | C    | 2.868235  | 0.759408  | -3.227244 |
| P    | 2.354529  | 2.161     | -0.051114 | H    | 3.266595  | 1.75303   | -3.379471 |
| P    | 3.015546  | -0.864497 | 0.822724  | C    | -3.377519 | -4.986482 | -2.270681 |
| S    | -2.86841  | -5.206704 | -0.446177 | H    | -4.360064 | -4.500901 | -2.289373 |
| S    | -5.021217 | 2.787602  | -1.291142 | H    | -2.62766  | -4.346592 | -2.749388 |
| N    | -3.326158 | 0.660437  | 1.581047  | C    | -3.252217 | 2.022583  | 3.643208  |
| N    | -2.591332 | -2.021114 | 1.803075  | H    | -2.747999 | 2.857993  | 3.143725  |
| N    | -3.108359 | -2.387433 | -0.602908 | H    | -2.900085 | 1.946811  | 4.675537  |
| H    | -3.36334  | -2.496463 | -1.580884 | H    | -4.321667 | 2.265863  | 3.646971  |
| N    | -0.900926 | -0.324418 | -0.015279 | C    | -5.587856 | 4.043539  | 0.034723  |
| N    | -3.949934 | 1.768285  | 1.020583  | H    | -6.217218 | 3.493943  | 0.738893  |
| N    | -2.550266 | -3.354805 | 1.450819  | H    | -4.690071 | 4.388108  | 0.553243  |
| N    | -3.791533 | 0.360077  | -0.840491 | C    | 3.620841  | -0.384838 | -2.808038 |
| H    | -4.017273 | 0.19434   | -1.819239 | H    | 4.685636  | -0.414754 | -2.628019 |
| C    | 1.087683  | 4.523645  | 0.968311  | C    | 1.487835  | 0.369278  | -3.40222  |
| H    | 1.999983  | 4.679355  | 1.540253  | H    | 0.689425  | 0.997447  | -3.770462 |
| C    | -2.849713 | -3.484005 | 0.136343  | C    | 7.69572   | -1.459796 | 0.765161  |
| C    | 3.760769  | 3.193293  | -0.772774 | H    | 8.771171  | -1.614704 | 0.743173  |
| C    | 0.954301  | 3.403223  | 0.116338  | C    | 6.859032  | -2.167546 | -0.121192 |
| C    | 0.227527  | -0.153904 | -0.382537 | H    | 7.28729   | -2.874188 | -0.827367 |
| C    | 0.051591  | 5.469011  | 1.062865  | C    | -6.347747 | 5.186298  | -0.653606 |
| H    | 0.164927  | 6.330478  | 1.716004  | H    | -5.699374 | 5.682883  | -1.39012  |
| C    | -2.329833 | -1.718832 | 3.105033  | H    | -7.211415 | 4.786215  | -1.203327 |
| C    | 3.514025  | 4.415054  | -1.433594 | C    | 2.703811  | -1.511313 | -2.73398  |
| H    | 2.505173  | 4.811443  | -1.499798 | H    | 2.964132  | -2.53367  | -2.497553 |
| C    | 5.083172  | 2.698305  | -0.707911 | C    | 7.128832  | -0.559146 | 1.684587  |
| H    | 5.297483  | 1.745164  | -0.230296 | H    | 7.764664  | -0.016102 | 2.379218  |
| C    | 4.890961  | -1.061022 | 0.827322  | C    | 1.40063   | -1.047395 | -3.113697 |
| C    | -0.223023 | 3.243496  | -0.639885 | H    | 0.507546  | -1.653101 | -3.177748 |
| H    | -0.333444 | 2.380353  | -1.288981 | C    | -3.436537 | -6.361776 | -2.960884 |
| C    | 4.577112  | 5.138441  | -2.00907  | H    | -3.59438  | -6.176296 | -4.034299 |
| H    | 4.374239  | 6.079375  | -2.514072 | H    | -2.461952 | -6.863564 | -2.873817 |
| C    | -3.007277 | 0.732945  | 2.895598  | C    | -4.556926 | -7.292577 | -2.443932 |

|   |           |           |           |   |           |           |           |
|---|-----------|-----------|-----------|---|-----------|-----------|-----------|
| C | -1.258836 | 4.193694  | -0.549034 | H | -5.524123 | -6.773798 | -2.527101 |
| H | -2.163469 | 4.06043   | -1.136473 | H | -4.406798 | -7.50233  | -1.375812 |
| C | 2.929109  | 1.838998  | 1.758377  | C | -4.61399  | -8.620736 | -3.226092 |
| H | 3.998904  | 2.06626   | 1.799321  | H | -5.415111 | -9.266721 | -2.846883 |
| H | 2.41157   | 2.547269  | 2.413001  | H | -3.668878 | -9.173348 | -3.137717 |
| C | -2.489432 | -0.397991 | 3.576685  | H | -4.802309 | -8.445368 | -4.293976 |
| H | -2.254587 | -0.244036 | 4.624771  | C | -6.841784 | 6.231133  | 0.376911  |
| C | -4.180876 | 1.530568  | -0.285388 | H | -7.492795 | 5.737423  | 1.113749  |
| C | -1.915974 | -2.824976 | 4.045862  | H | -5.981423 | 6.631295  | 0.934807  |
| H | -1.706043 | -2.428315 | 5.042994  | C | -7.608153 | 7.392039  | -0.290686 |
| H | -1.029494 | -3.343659 | 3.663223  | H | -6.972512 | 7.923955  | -1.011261 |
| H | -2.706886 | -3.581245 | 4.118844  | H | -7.950435 | 8.119375  | 0.455874  |
| C | 2.642753  | 0.39195   | 2.205383  | H | -8.491277 | 7.023991  | -0.829523 |
| H | 1.57771   | 0.257978  | 2.425292  | C | 2.72486   | -4.317616 | 3.159379  |
| H | 3.200664  | 0.138425  | 3.114422  | H | 3.263724  | -4.756068 | 3.99544   |
| C | 5.894036  | 4.649718  | -1.929282 | C | 3.145341  | -3.086507 | 2.626192  |
| H | 6.71345   | 5.211077  | -2.370521 | H | 4.01874   | -2.593752 | 3.046824  |
| C | -1.123381 | 5.306243  | 0.301209  | C | 2.45388   | -2.512804 | 1.53519   |
| H | -1.91982  | 6.043362  | 0.36823   | C | 1.34639   | -3.184525 | 0.980822  |
| C | 6.143525  | 3.426344  | -1.276437 | H | 0.814282  | -2.748461 | 0.141087  |
| H | 7.156754  | 3.03757   | -1.214398 | C | 0.9278    | -4.418954 | 1.515038  |
| C | 5.733586  | -0.362395 | 1.717291  | H | 0.069085  | -4.927119 | 1.085993  |
| H | 5.325159  | 0.327301  | 2.450273  | C | 1.615431  | -4.986474 | 2.603554  |
| C | 5.468563  | -1.966525 | -0.091465 | H | 1.295432  | -5.941898 | 3.011713  |

### Optimized Cartesian Coordinates of complex $2_{\text{Me}}^+$

| Atom | X         | Y         | Z         | Atom | X         | Y         | Z        |
|------|-----------|-----------|-----------|------|-----------|-----------|----------|
| Ru   | 1.545588  | 0.009434  | -1.172124 | C    | 0.632703  | 4.817216  | 2.584472 |
| Fe   | -3.428431 | -0.14094  | -0.096318 | H    | 0.892245  | 5.418371  | 3.452075 |
| P    | 2.125705  | -1.67869  | 0.451883  | C    | -0.826346 | 4.362452  | 0.686073 |
| P    | 2.238206  | 1.521543  | 0.572816  | H    | -1.701038 | 4.60058   | 0.087588 |
| S    | -4.438421 | -4.489846 | -0.87865  | C    | 1.811829  | -0.846158 | 2.140185 |
| S    | -4.583712 | 3.733257  | -2.04162  | H    | 0.728535  | -0.729375 | 2.246932 |

|   |           |           |           |   |           |           |           |
|---|-----------|-----------|-----------|---|-----------|-----------|-----------|
| N | -4.083003 | 2.586037  | 0.40384   | H | 2.169378  | -1.497776 | 2.944992  |
| N | -3.701827 | -1.381623 | 1.3732    | C | 2.517756  | 0.52297   | 2.192571  |
| N | -3.801297 | 1.386226  | 1.050771  | H | 3.596257  | 0.394876  | 2.329076  |
| N | -1.461415 | -0.111632 | -0.231235 | H | 2.14252   | 1.116066  | 3.032624  |
| N | -4.010077 | 1.112161  | -1.411508 | C | 4.298961  | -3.07897  | 1.690147  |
| H | -4.159259 | 0.963463  | -2.407413 | H | 3.557785  | -3.426455 | 2.406277  |
| C | 3.918741  | -2.241689 | 0.615295  | C | 6.606571  | -3.079469 | 0.897098  |
| N | -3.915332 | -2.701626 | 1.033135  | H | 7.638223  | -3.404473 | 1.004016  |
| N | -3.966573 | -1.704555 | -1.08003  | C | -3.664325 | 1.42969   | 2.396101  |
| H | -4.105236 | -1.78647  | -2.083913 | C | -0.305551 | -5.706856 | 0.518876  |
| C | 3.882129  | 3.733682  | -0.21414  | H | -0.872125 | -6.634317 | 0.525503  |
| H | 2.947519  | 4.268175  | -0.360621 | C | 1.748323  | -4.485877 | 0.024906  |
| C | 5.097061  | 4.384305  | -0.499323 | H | 2.768653  | -4.489873 | -0.348394 |
| H | 5.085002  | 5.406022  | -0.870131 | C | -0.50271  | 5.139865  | 1.812999  |
| C | 1.441805  | 3.726105  | 2.223309  | H | -1.120455 | 5.991951  | 2.08618   |
| H | 2.33289   | 3.509486  | 2.80875   | C | -0.162019 | -3.315932 | 0.984588  |
| C | -4.194984 | 2.357279  | -0.91709  | H | -0.643511 | -2.404987 | 1.328343  |
| C | 4.894883  | -1.83048  | -0.313082 | C | 1.014183  | -5.686198 | 0.03018   |
| H | 4.616321  | -1.180505 | -1.135347 | H | 1.473299  | -6.597984 | -0.343305 |
| C | -0.295394 | -0.063312 | -0.51375  | C | 5.635259  | -3.491432 | 1.832265  |
| C | 1.119055  | 2.943316  | 1.091019  | H | 5.915857  | -4.135409 | 2.661605  |
| C | 0.855758  | 0.62444   | -3.327676 | C | -0.892298 | -4.518413 | 0.993147  |
| C | 6.321778  | 3.719934  | -0.299136 | H | -1.917094 | -4.5176   | 1.352742  |
| H | 7.259919  | 4.22536   | -0.512772 | C | -5.144689 | 5.072344  | -0.832985 |
| C | 3.877851  | 2.40814   | 0.27331   | H | -5.305115 | 5.963249  | -1.444543 |
| C | 1.168574  | -3.293945 | 0.512516  | H | -4.366634 | 5.241869  | -0.08934  |
| C | -3.500597 | 0.234382  | 3.14477   | H | -6.0719   | 4.761221  | -0.350923 |
| H | -3.38966  | 0.367779  | 4.215762  | C | 2.6016    | -0.911765 | -3.035441 |
| C | -3.566741 | -1.10196  | 2.701191  | H | 3.15239   | -1.841991 | -3.003108 |
| C | 5.108621  | 1.741618  | 0.459662  | C | -4.068474 | -2.802307 | -0.310429 |
| H | 5.14136   | 0.715465  | 0.814697  | C | 3.140101  | 0.403393  | -2.825494 |
| C | -3.553327 | -2.240435 | 3.694269  | H | 4.173204  | 0.662305  | -2.642984 |
| H | -3.408123 | -1.866166 | 4.711173  | C | -3.735938 | 2.760725  | 3.106044  |
| H | -2.761054 | -2.959784 | 3.455866  | H | -3.589606 | 2.635538  | 4.182201  |
| H | -4.496024 | -2.798813 | 3.648471  | H | -4.707675 | 3.237188  | 2.929327  |

|   |           |           |           |   |           |           |           |
|---|-----------|-----------|-----------|---|-----------|-----------|-----------|
| C | 2.051963  | 1.34866   | -2.998664 | H | -2.975617 | 3.444948  | 2.712588  |
| H | 2.140247  | 2.425709  | -2.954871 | C | -0.472314 | 1.218574  | -3.713833 |
| C | 6.322654  | 2.396906  | 0.182161  | H | -1.307065 | 0.630595  | -3.316854 |
| H | 7.262711  | 1.874974  | 0.342286  | H | -0.567772 | 1.245238  | -4.808424 |
| C | 1.192274  | -0.789664 | -3.314564 | H | -0.57565  | 2.246286  | -3.348082 |
| H | 0.520716  | -1.600687 | -3.56017  | C | -4.557471 | -4.232332 | -2.74058  |
| C | 6.233102  | -2.250306 | -0.176068 | H | -3.60559  | -3.877615 | -3.144187 |
| H | 6.975567  | -1.931584 | -0.903341 | H | -5.379219 | -3.554545 | -2.98648  |
| C | -0.01868  | 3.265368  | 0.327215  | H | -4.775852 | -5.219981 | -3.152824 |
| H | -0.273939 | 2.663538  | -0.539405 |   |           |           |           |

### Optimized Cartesian Coordinates of complex $3_{\text{Me}}^+$

| Atom | X         | Y         | Z         | Atom | X         | Y         | Z         |
|------|-----------|-----------|-----------|------|-----------|-----------|-----------|
| Ru   | -1.399828 | 0.054579  | 0.997567  | C    | -5.063411 | 3.822769  | -2.330754 |
| Fe   | 3.56303   | -0.14735  | -0.134417 | H    | -5.223833 | 4.525037  | -3.14468  |
| P    | -1.81401  | 1.757712  | -0.682059 | C    | -1.422367 | -3.712433 | -2.37214  |
| P    | -2.146638 | -1.432449 | -0.786847 | H    | -2.263348 | -3.439255 | -3.006043 |
| S    | 4.406845  | -4.300072 | 1.470042  | C    | -2.016102 | -1.178201 | 2.884356  |
| S    | 4.989097  | 4.065737  | 0.74129   | C    | -0.706048 | -0.615629 | 3.088115  |
| N    | 3.898771  | 1.108878  | -1.576606 | C    | -4.471834 | -0.256559 | 2.784657  |
| N    | 3.922958  | -2.897485 | -0.747388 | H    | -4.992692 | 0.697432  | 2.651109  |
| N    | 4.094785  | -1.50215  | 1.121165  | H    | -4.795477 | -0.661417 | 3.754824  |
| N    | 4.247288  | 2.39569   | -1.203706 | H    | -4.825008 | -0.948026 | 2.011066  |
| N    | 4.268431  | 1.328288  | 0.876026  | C    | -0.832642 | 0.839516  | 3.070376  |
| N    | 3.733672  | -1.661109 | -1.338658 | C    | 3.534295  | -1.647701 | -2.682255 |
| C    | 0.438068  | -0.007691 | 0.338348  | C    | -2.213107 | -0.430775 | -2.43179  |
| C    | -3.767879 | 3.345988  | -2.065162 | H    | -1.809308 | -1.06074  | -3.230759 |
| H    | -2.936398 | 3.699543  | -2.670509 | H    | -3.264275 | -0.231916 | -2.662757 |
| C    | 4.118747  | -2.736205 | 0.577307  | C    | -2.382906 | -2.635236 | 2.985665  |
| C    | 3.690335  | 0.888813  | -2.901912 | H    | -2.587654 | -2.899372 | 4.03417   |
| C    | -0.762126 | 3.315263  | -0.675389 | H    | -1.57827  | -3.290252 | 2.634342  |
| C    | -0.490318 | 5.682189  | -0.117175 | H    | -3.283558 | -2.866998 | 2.40972   |
| H    | -0.912071 | 6.609039  | 0.263582  | C    | 5.145862  | 3.735394  | 2.588683  |

|   |           |           |           |   |           |           |           |
|---|-----------|-----------|-----------|---|-----------|-----------|-----------|
| C | -3.545739 | 2.43274   | -1.008553 | H | 5.466304  | 4.685178  | 3.022831  |
| C | 0.712937  | -4.48905  | -0.713099 | H | 5.911094  | 2.979346  | 2.783902  |
| H | 1.541962  | -4.781463 | -0.075043 | H | 4.180234  | 3.453558  | 3.016596  |
| C | -4.635779 | 2.007433  | -0.226767 | C | -0.674832 | -4.861947 | -2.681606 |
| H | -4.471981 | 1.296239  | 0.575166  | H | -0.93     | -5.452452 | -3.557928 |
| C | 3.434465  | -2.958583 | -3.424423 | C | 0.26452   | 1.819538  | 3.396432  |
| H | 3.247553  | -2.789116 | -4.488312 | H | 0.352366  | 1.96217   | 4.484357  |
| H | 2.63221   | -3.576191 | -3.005208 | H | 0.076873  | 2.800723  | 2.947572  |
| H | 4.360101  | -3.535232 | -3.308881 | H | 1.234122  | 1.469192  | 3.024806  |
| C | 4.448436  | 2.436958  | 0.132118  | C | 1.381694  | 4.433555  | -1.044824 |
| C | -0.03393  | -3.334318 | -0.406302 | H | 2.416426  | 4.383098  | -1.370727 |
| H | 0.21962   | -2.73701  | 0.464096  | C | -2.972693 | -0.08394  | 2.764713  |
| C | -1.290561 | 4.52643   | -0.174481 | C | 0.393203  | -5.254934 | -1.848884 |
| H | -2.325037 | 4.581063  | 0.153659  | H | 0.96659   | -6.148514 | -2.082517 |
| N | 1.610301  | -0.032103 | 0.072397  | C | 4.72086   | -3.675288 | 3.219395  |
| C | -5.933917 | 2.489577  | -0.487536 | H | 5.601854  | -3.028684 | 3.24503   |
| H | -6.767411 | 2.157423  | 0.126703  | H | 4.91972   | -4.57128  | 3.811806  |
| C | 0.584322  | 3.275259  | -1.098111 | H | 3.838183  | -3.16996  | 3.620415  |
| H | 1.025768  | 2.349058  | -1.45365  | C | -5.026894 | -1.456322 | -0.981939 |
| C | 3.469556  | -0.421441 | -3.384869 | H | -4.951604 | -0.428862 | -1.324189 |
| H | 3.305787  | -0.50443  | -4.454193 | C | -6.306007 | -2.02977  | -0.855808 |
| C | 3.758303  | 2.053771  | -3.861683 | H | -7.184277 | -1.442437 | -1.111917 |
| H | 3.051648  | 2.841142  | -3.574388 | C | -6.448793 | -3.355636 | -0.405222 |
| H | 3.54237   | 1.728273  | -4.882794 | H | -7.436547 | -3.799084 | -0.310675 |
| H | 4.753757  | 2.513099  | -3.834157 | C | -5.300841 | -4.104379 | -0.083756 |
| C | 0.846527  | 5.640267  | -0.556198 | H | -5.397569 | -5.130634 | 0.261447  |
| H | 1.464406  | 6.533537  | -0.516126 | C | -4.021168 | -3.534124 | -0.216176 |
| C | -1.10589  | -2.941427 | -1.229862 | H | -3.147775 | -4.135973 | 0.017562  |
| C | -2.824528 | 2.537339  | 3.006156  | C | -3.870141 | -2.205023 | -0.672258 |
| H | -2.137667 | 3.299935  | 2.624127  | C | -2.237748 | 1.153557  | 2.901729  |
| H | -3.025017 | 2.777274  | 4.060828  | C | 0.54676   | -1.378743 | 3.43057   |
| H | -3.769768 | 2.633229  | 2.464385  | H | 0.482987  | -2.424289 | 3.10991   |
| C | -6.150683 | 3.397312  | -1.540066 | H | 0.706127  | -1.376657 | 4.519328  |
| H | -7.150927 | 3.771334  | -1.742839 | H | 1.4312    | -0.935596 | 2.96004   |
| C | -1.423853 | 0.890082  | -2.335737 | H | 4.448207  | 1.368988  | 1.875681  |

|   |           |          |           |   |          |           |          |
|---|-----------|----------|-----------|---|----------|-----------|----------|
| H | -1.67918  | 1.554784 | -3.16863  | H | 4.273261 | -1.395372 | 2.116216 |
| H | -0.346138 | 0.701124 | -2.360051 |   |          |           |          |
